# Supplementary material
Source: PubMed Central journal article supplement (PMC2442556)
Supplement: pp.108.116764_1.pdf [file pp.108.116764_1.pdf]

## SUPPLEMENTAL MATERIAL

### SUPPLEMENTARY TABLES

**Supplementary Table S1:** Glycan array binding of EEA at a concentration of 200 $\mu$ g/ml: list of glycan structures ranked from highest relative fluorescence units (RFU) to lowest.

EEA3-Alexa488 at 200ug/ml cfg\_rRequest\_904 array-333211

| Glycan Number | Glycan name                                                                                                                                                                                   | Avg RFU | StDev | SEM   | %CV |
|---------------|-----------------------------------------------------------------------------------------------------------------------------------------------------------------------------------------------|---------|-------|-------|-----|
| 198           | Man $\alpha$ 1-6(Man $\alpha$ 1-3)Man $\alpha$ 1-6(Man $\alpha$ 1-3)Man $\beta$ 1-4GlcNAc $\beta$ 1-4GlcNAc $\beta$ -Sp12                                                                     | 50258   | 13085 | 6542  | 26  |
| 99            | Gal $\alpha$ 1-3(Fuc $\alpha$ 1-2)Gal $\beta$ -Sp8                                                                                                                                            | 49370   | 15825 | 7912  | 32  |
| 98            | Gal $\alpha$ 1-3(Fuc $\alpha$ 1-2)Gal $\beta$ 1-4Glc $\beta$ -Sp0                                                                                                                             | 47659   | 15351 | 7676  | 32  |
| 290           | Gal $\alpha$ 1-3(Fuc $\alpha$ 1-2)Gal $\beta$ -Sp18                                                                                                                                           | 45917   | 15683 | 7841  | 34  |
| 197           | Man $\alpha$ 1-6(Man $\alpha$ 1-3)Man $\alpha$ 1-6(Man $\alpha$ 2Man $\alpha$ 1-3)Man $\beta$ 1-4GlcNAc $\beta$ 1-4GlcNAc $\beta$ -Sp12                                                       | 40788   | 6906  | 3453  | 17  |
| 310           | Man $\alpha$ 1-3(Man $\alpha$ 1-6)Man $\beta$ 1-4GlcNAc $\beta$ 1-4GlcNAc $\beta$ -Sp12                                                                                                       | 37819   | 7060  | 3530  | 19  |
| 192           | Man $\alpha$ 1-6(Man $\alpha$ 1-2Man $\alpha$ 1-3)Man $\alpha$ 1-6(Man $\alpha$ 2Man $\alpha$ 1-3)Man $\beta$ 1-4GlcNAc $\beta$ 1-4GlcNAc $\beta$ -Sp12                                       | 36914   | 8601  | 4301  | 23  |
| 97            | Gal $\alpha$ 1-3(Fuc $\alpha$ 1-2)Gal $\beta$ 1-4GlcNAc-Sp0                                                                                                                                   | 35329   | 1700  | 850   | 5   |
| 95            | Gal $\alpha$ 1-3(Fuc $\alpha$ 1-2)Gal $\beta$ 1-3GlcNAc $\beta$ -Sp0                                                                                                                          | 35176   | 4455  | 2228  | 13  |
| 50            | Man $\alpha$ 1-3(Man $\alpha$ 1-6)Man $\beta$ 1-4GlcNAc $\beta$ 1-4GlcNAc $\beta$ -Sp13                                                                                                       | 30930   | 20296 | 10148 | 66  |
| 61            | Fuc $\alpha$ 1-2Gal $\beta$ 1-3GlcNAc $\beta$ 1-3Gal $\beta$ 1-4Glc $\beta$ -Sp10                                                                                                             | 24615   | 2171  | 1085  | 9   |
| 193           | Man $\alpha$ 1-2Man $\alpha$ 1-6(Man $\alpha$ 1-3)Man $\alpha$ 1-6(Man $\alpha$ 2Man $\alpha$ 2Man $\alpha$ 1-3)Man $\beta$ 1-4GlcNAc $\beta$ 1-4GlcNAc $\beta$ -Sp12                         | 24511   | 2120  | 1060  | 9   |
| 241           | Gal $\beta$ 1-4GlcNAc $\beta$ 1-2Man $\alpha$ 1-3(Fuc $\alpha$ 1-3(Gal $\beta$ 1-4)GlcNAc $\beta$ 1-2Man $\alpha$ 1-6)Man $\beta$ 1-4GlcNAc $\beta$ 1-4GlcNAc $\beta$ -Sp20                   | 23203   | 813   | 407   | 4   |
| 63            | Fuc $\alpha$ 1-2Gal $\beta$ 1-3GlcNAc $\beta$ -Sp0                                                                                                                                            | 21920   | 14903 | 7452  | 68  |
| 312           | Man $\alpha$ 1-6(Man $\alpha$ 1-3)Man $\alpha$ 1-6(Man $\alpha$ 1-3)Man $\beta$ -Sp10                                                                                                         | 19915   | 2938  | 1469  | 15  |
| 69            | Fuc $\alpha$ 1-2Gal $\beta$ 1-4GlcNAc $\beta$ 1-3Gal $\beta$ 1-4GlcNAc-Sp0                                                                                                                    | 19799   | 4998  | 2499  | 25  |
| 172           | (GlcNAc $\beta$ 1-4)5 $\beta$ -Sp8                                                                                                                                                            | 12800   | 894   | 447   | 7   |
| 201           | Fuc $\alpha$ 1-3(Gal $\beta$ 1-4)GlcNAc $\beta$ 1-2Man $\alpha$ 1-3(Fuc $\alpha$ 1-3(Gal $\beta$ 1-4)GlcNAc $\beta$ 1-2Man $\alpha$ 1-6)Man $\beta$ 1-4GlcNAc $\beta$ 1-4GlcNAc $\beta$ -Sp20 | 11885   | 3324  | 1662  | 28  |
| 62            | Fuc $\alpha$ 1-2Gal $\beta$ 1-3GlcNAc $\beta$ 1-3Gal $\beta$ 1-4Glc $\beta$ -Sp8                                                                                                              | 9804    | 11082 | 5541  | 113 |

|     |                                                                                           |      |      |      |    |
|-----|-------------------------------------------------------------------------------------------|------|------|------|----|
| 52  | Galβ1-4GlcNAcβ1-2Manα1-3(Galβ1-4GlcNAcβ1-2Manα1-6)Manβ1-4GlcNAcβ1-4GlcNAcβ-Sp13           | 9560 | 1937 | 968  | 20 |
| 64  | Fuca1-2Galβ1-3GlcNAcβ-Sp8                                                                 | 7994 | 1204 | 602  | 15 |
| 173 | GlcNAcβ1-4GlcNAcβ1-4GlcNAcβ-Sp8                                                           | 7530 | 882  | 441  | 12 |
| 79  | GalNAcα1-3(Fuca1-2)Galβ1-3GlcNAcβ-Sp0                                                     | 7512 | 1579 | 790  | 21 |
| 105 | Galα1-3Galβ1-4GlcNAcβ-Sp8                                                                 | 6872 | 1670 | 835  | 24 |
| 171 | (GlcNAcβ1-4)6β-Sp8                                                                        | 6402 | 574  | 287  | 9  |
| 51  | GlcNAcβ1-2Manα1-3(GlcNAcβ1-2Manα1-6)Manβ1-4GlcNAcβ1-4GlcNAcβ-Sp13                         | 6356 | 733  | 366  | 12 |
| 87  | GalNAcα1-4(Fuca1-2)Galβ1-4GlcNAcβ-Sp8                                                     | 6044 | 860  | 430  | 14 |
| 313 | Manα1-2Manα1-2Manα1-3(Manα1-2Manα1-6(Manα1-3)Manα1-6)Manα-Sp9                             | 5900 | 683  | 342  | 12 |
| 70  | Fuca1-2Galβ1-4GlcNAcβ1-3Galβ1-4GlcNAcβ1-3Galβ1-4GlcNAcβ-Sp0                               | 5641 | 1750 | 875  | 31 |
| 72  | Fuca1-2Galβ1-4GlcNAcβ-Sp8                                                                 | 4881 | 3933 | 1967 | 81 |
| 103 | Galα1-3Galβ1-4(Fuca1-3)GlcNAcβ-Sp8                                                        | 4514 | 518  | 259  | 11 |
| 194 | Manα1-2Manα1-2Manα1-3(Manα1-2Manα1-3(Manα1-2Manα1-6)Manα1-6)Manβ1-4GlcNAcβ1-4GlcNAcβ-Sp12 | 3896 | 1872 | 936  | 48 |
| 112 | Galα1-4GlcNAcβ-Sp8                                                                        | 3204 | 1928 | 964  | 60 |
| 86  | GalNAcα1-3Galβ-Sp8                                                                        | 2835 | 423  | 211  | 15 |
| 10  | α-GalNAc-Sp8                                                                              | 2805 | 379  | 190  | 14 |
| 270 | Fuca1-2Galβ1-4[6OSO3]GlcNAc-Sp8                                                           | 2543 | 483  | 242  | 19 |
| 156 | GlcNAcα1-3Galβ1-4GlcNAcβ-Sp8                                                              | 2063 | 117  | 59   | 6  |
| 305 | GlcNAcβ1-2Manα1-3(GlcNAcβ1-2Manα1-6)Manβ1-4GlcNAcβ1-4GlcNAcβ-Sp12                         | 1914 | 637  | 319  | 33 |
| 94  | Galα1-2Galβ-Sp8                                                                           | 1900 | 343  | 171  | 18 |
| 307 | GlcNAcβ1-4GlcNAcβ-Sp10                                                                    | 1852 | 243  | 121  | 13 |
| 309 | HOOC(CH3)CH-3-O-GlcNAcβ1-4GlcNAcβ-Sp10                                                    | 1786 | 175  | 87   | 10 |
| 314 | Manα1-2Manα1-2Manα1-3(Manα1-2Manα1-6(Manα1-2Manα1-3)Manα1-6)Manα-Sp9                      | 1775 | 201  | 100  | 11 |
| 319 | Neu5Acα2-6Galβ1-4GlcNAcβ1-2Manα1-3(Galβ1-4GlcNAcβ1-2Manα1-6)Manβ1-4GlcNAcβ1-4GlcNAcβ-Sp12 | 1752 | 134  | 67   | 8  |
| 308 | GlcNAcβ1-4GlcNAcβ-Sp12                                                                    | 1700 | 103  | 52   | 6  |
| 104 | Galα1-3Galβ1-3GlcNAcβ-Sp0                                                                 | 1530 | 495  | 248  | 32 |
| 57  | Fuca1-2Galβ1-3(Fuca1-4)GlcNAcβ-Sp8                                                        | 1402 | 128  | 64   | 9  |
| 111 | Galα1-4Galβ1-4Glcβ-Sp0                                                                    | 1337 | 252  | 126  | 19 |
| 300 | GalNAcα-Sp15                                                                              | 1321 | 203  | 101  | 15 |
| 92  | GalNAcβ1-4GlcNAcβ-Sp0                                                                     | 1277 | 217  | 109  | 17 |
| 176 | GlcNAcβ1-6Galβ1-4GlcNAcβ-Sp8                                                              | 1245 | 280  | 140  | 22 |
| 195 | Manα1-3(Manα1-6)Manα-Sp9                                                                  | 1136 | 350  | 175  | 31 |

|     |                                                                                                                                                                            |      |     |     |    |
|-----|----------------------------------------------------------------------------------------------------------------------------------------------------------------------------|------|-----|-----|----|
| 175 | GlcNAc $\beta$ 1-6GalNAc $\alpha$ -Sp8                                                                                                                                     | 1128 | 85  | 43  | 8  |
| 100 | Gal $\alpha$ 1-3(Gal $\alpha$ 1-4)Gal $\beta$ 1-4GlcNAc $\beta$ -Sp8                                                                                                       | 1124 | 114 | 57  | 10 |
| 68  | Fuc $\alpha$ 1-2Gal $\beta$ 1-4(Fuc $\alpha$ 1-3)GlcNAc $\beta$ -Sp8                                                                                                       | 992  | 197 | 98  | 20 |
| 91  | GalNAc $\beta$ 1-4(Fuc $\alpha$ 1-3)GlcNAc $\beta$ -Sp0                                                                                                                    | 991  | 974 | 487 | 98 |
| 85  | GalNAc $\alpha$ 1-3GalNAc $\beta$ -Sp8                                                                                                                                     | 937  | 384 | 192 | 41 |
| 190 | Man $\alpha$ 1-2Man $\alpha$ 1-3(Man $\alpha$ 1-2Man $\alpha$ 1-6)Man $\alpha$ -Sp9                                                                                        | 920  | 286 | 143 | 31 |
| 67  | Fuc $\alpha$ 1-2Gal $\beta$ 1-4(Fuc $\alpha$ 1-3)GlcNAc $\beta$ -Sp0                                                                                                       | 866  | 145 | 72  | 17 |
| 93  | GalNAc $\beta$ 1-4GlcNAc $\beta$ -Sp8                                                                                                                                      | 830  | 86  | 43  | 10 |
| 106 | Gal $\alpha$ 1-3Gal $\beta$ 1-4Glc $\beta$ -Sp0                                                                                                                            | 797  | 269 | 135 | 34 |
| 82  | GalNAc $\alpha$ 1-3(Fuc $\alpha$ 1-2)Gal $\beta$ 1-4GlcNAc $\beta$ -Sp8                                                                                                    | 793  | 103 | 52  | 13 |
| 196 | Man $\alpha$ 1-3(Man $\alpha$ 1-2Man $\alpha$ 1-2Man $\alpha$ 1-6)Man $\alpha$ -Sp9                                                                                        | 723  | 187 | 93  | 26 |
| 65  | Fuc $\alpha$ 1-2Gal $\beta$ 1-4(Fuc $\alpha$ 1-3)GlcNAc $\beta$ 1-3Gal $\beta$ 1-4(Fuc $\alpha$ 1-3)GlcNAc $\beta$ -Sp0                                                    | 720  | 91  | 46  | 13 |
| 107 | Gal $\alpha$ 1-3Gal $\beta$ -Sp8                                                                                                                                           | 668  | 225 | 113 | 34 |
| 168 | GlcNAc $\beta$ 1-4MDPLys                                                                                                                                                   | 657  | 62  | 31  | 9  |
| 155 | Gal $\beta$ 1-4Glc $\beta$ -Sp8                                                                                                                                            | 651  | 157 | 79  | 24 |
| 301 | GalNAc $\alpha$ 1-3(Fuc $\alpha$ 1-2)Gal $\beta$ -Sp18                                                                                                                     | 613  | 276 | 138 | 45 |
| 160 | GlcNAc $\beta$ 1-3(GlcNAc $\beta$ 1-6)Gal $\beta$ 1-4GlcNAc $\beta$ -Sp8                                                                                                   | 594  | 168 | 84  | 28 |
| 297 | Gal $\beta$ 1-4GlcNAc $\beta$ 1-3(GlcNAc $\beta$ 1-6)Gal $\beta$ 1-4GlcNAc-Sp0                                                                                             | 590  | 95  | 48  | 16 |
| 151 | Gal $\beta$ 1-4GlcNAc $\beta$ 1-6GalNAc $\alpha$ -Sp8                                                                                                                      | 581  | 338 | 169 | 58 |
| 110 | Gal $\alpha$ 1-4Gal $\beta$ 1-4GlcNAc $\beta$ -Sp8                                                                                                                         | 543  | 145 | 73  | 27 |
| 128 | Gal $\beta$ 1-3GalNAc $\beta$ 1-4(Neu5Ac $\alpha$ 2-3)Gal $\beta$ 1-4Glc $\beta$ -Sp0                                                                                      | 525  | 300 | 150 | 57 |
| 157 | GlcNAc $\alpha$ 1-6Gal $\beta$ 1-4GlcNAc $\beta$ -Sp8                                                                                                                      | 522  | 122 | 61  | 23 |
| 167 | GlcNAc $\beta$ 1-3Gal $\beta$ 1-4Glc $\beta$ -Sp0                                                                                                                          | 504  | 104 | 52  | 21 |
| 304 | GlcNAc $\beta$ 1-2Man $\alpha$ 1-3(Neu5Ac $\alpha$ 2-6Gal $\beta$ 1-4GlcNAc $\beta$ 1-2Man $\alpha$ 1-6)Man $\beta$ 1-4GlcNAc $\beta$ 1-4GlcNAc $\beta$ -Sp12              | 485  | 227 | 113 | 47 |
| 320 | Neu5Ac $\alpha$ 2-6Gal $\beta$ 1-4GlcNAc $\beta$ 1-2Man $\alpha$ 1-3(GlcNAc $\beta$ 1-2Man $\alpha$ 1-6)Man $\beta$ 1-4GlcNAc $\beta$ 1-4GlcNAc $\beta$ -Sp12              | 477  | 101 | 51  | 21 |
| 169 | GlcNAc $\beta$ 1-4(GlcNAc $\beta$ 1-6)GalNAc $\alpha$ -Sp8                                                                                                                 | 460  | 91  | 46  | 20 |
| 66  | Fuc $\alpha$ 1-2Gal $\beta$ 1-4(Fuc $\alpha$ 1-3)GlcNAc $\beta$ 1-3Gal $\beta$ 1-4(Fuc $\alpha$ 1-3)GlcNAc $\beta$ 1-3Gal $\beta$ 1-4(Fuc $\alpha$ 1-3)GlcNAc $\beta$ -Sp0 | 441  | 197 | 99  | 45 |
| 166 | GlcNAc $\beta$ 1-3Gal $\beta$ 1-4GlcNAc $\beta$ 1-3Gal $\beta$ 1-4GlcNAc $\beta$ -Sp0                                                                                      | 440  | 143 | 72  | 33 |
| 109 | Gal $\alpha$ 1-4Gal $\beta$ 1-4GlcNAc $\beta$ -Sp0                                                                                                                         | 432  | 247 | 123 | 57 |
| 164 | GlcNAc $\beta$ 1-3Gal $\beta$ 1-4GlcNAc $\beta$ -Sp0                                                                                                                       | 406  | 53  | 26  | 13 |
| 14  | $\alpha$ -Neu5Ac-Sp8                                                                                                                                                       | 383  | 172 | 86  | 45 |
| 139 | Gal $\beta$ 1-4[6OSO <sub>3</sub> ]Glc $\beta$ -Sp0                                                                                                                        | 379  | 157 | 78  | 41 |

|     |                                                                                                                                                                                                 |     |     |     |    |
|-----|-------------------------------------------------------------------------------------------------------------------------------------------------------------------------------------------------|-----|-----|-----|----|
| 159 | GlcNAc $\beta$ 1-3(GlcNAc $\beta$ 1-6)GalNAc $\alpha$ -Sp8                                                                                                                                      | 375 | 81  | 41  | 22 |
| 265 | [3OSO3]Gal $\beta$ 1-4(Fuca1-3)(6OSO3)Glc-Sp0                                                                                                                                                   | 364 | 193 | 96  | 53 |
| 163 | GlcNAc $\beta$ 1-3Gal $\beta$ 1-3GalNAc $\alpha$ -Sp8                                                                                                                                           | 359 | 149 | 74  | 41 |
| 293 | Gal $\beta$ 1-3(Neu5Ac $\alpha$ 2-3Gal $\beta$ 1-4(Fuca1-3)GlcNAc $\beta$ 1-6)GalNAc-Sp14                                                                                                       | 351 | 279 | 140 | 80 |
| 222 | Neu5Ac $\alpha$ 2-3Gal $\beta$ -Sp8                                                                                                                                                             | 328 | 106 | 53  | 32 |
| 247 | Neu5Ac $\alpha$ 2-6Gal $\beta$ 1-4GlcNAc $\beta$ 1-3Gal $\beta$ 1-4(Fuca1-3)GlcNAc $\beta$ 1-3Gal $\beta$ 1-4(Fuca1-3)GlcNAc $\beta$ -Sp0                                                       | 308 | 119 | 60  | 39 |
| 58  | Fuca1-2Gal $\beta$ 1-3GalNAc $\alpha$ -Sp8                                                                                                                                                      | 307 | 106 | 53  | 34 |
| 81  | GalNAc $\alpha$ 1-3(Fuca1-2)Gal $\beta$ 1-4GlcNAc $\beta$ -Sp0                                                                                                                                  | 306 | 135 | 68  | 44 |
| 191 | Man $\alpha$ 1-2Man $\alpha$ 1-3Man $\alpha$ -Sp9                                                                                                                                               | 305 | 79  | 40  | 26 |
| 218 | NeuAc $\alpha$ 2-3Gal $\beta$ 1-3(Fuca1-4)GlcNAc $\beta$ 1-3Gal $\beta$ 1-4(Fuca1-3)GlcNAc $\beta$ Sp0                                                                                          | 287 | 27  | 13  | 9  |
| 272 | Fuca1-2-(6OSO3)-Gal $\beta$ 1-4Glc-Sp0                                                                                                                                                          | 282 | 207 | 103 | 73 |
| 165 | GlcNAc $\beta$ 1-3Gal $\beta$ 1-4GlcNAc $\beta$ -Sp8                                                                                                                                            | 272 | 82  | 41  | 30 |
| 71  | Fuca1-2Gal $\beta$ 1-4GlcNAc $\beta$ -Sp0                                                                                                                                                       | 272 | 107 | 53  | 39 |
| 142 | Gal $\beta$ 1-4GalNAc $\beta$ 1-3(Fuca1-2)Gal $\beta$ 1-4GlcNAc $\beta$ -Sp8                                                                                                                    | 271 | 67  | 34  | 25 |
| 126 | Gal $\beta$ 1-3GalNAc $\beta$ -Sp8                                                                                                                                                              | 269 | 54  | 27  | 20 |
| 36  | [3OSO3]Gal $\beta$ 1-4GlcNAc $\beta$ -Sp0                                                                                                                                                       | 267 | 195 | 97  | 73 |
| 96  | Gal $\alpha$ 1-3(Fuca1-2)Gal $\beta$ 1-4(Fuca1-3)GlcNAc $\beta$ -Sp0                                                                                                                            | 265 | 16  | 8   | 6  |
| 170 | GlcNAc $\beta$ 1-4Gal $\beta$ 1-4GlcNAc $\beta$ -Sp8                                                                                                                                            | 265 | 108 | 54  | 41 |
| 150 | Gal $\beta$ 1-4GlcNAc $\beta$ 1-6(Gal $\beta$ 1-3)GalNAc $\alpha$ -Sp8                                                                                                                          | 262 | 81  | 40  | 31 |
| 5   | Gal $\beta$ 1-3GlcNAc $\beta$ 1-2Man $\alpha$ 1-3(Gal $\beta$ 1-3GlcNAc $\beta$ 1-2Man $\alpha$ 1-6)Man $\beta$ 1-4GlcNAc $\beta$ 1-4GlcNAc $\beta$ -Sp19                                       | 261 | 175 | 87  | 67 |
| 130 | Gal $\beta$ 1-3Gal $\beta$ -Sp8                                                                                                                                                                 | 255 | 150 | 75  | 59 |
| 143 | Neu5Ac $\alpha$ 2-3Gal $\beta$ 1-4GlcNAc $\beta$ 1-2Man $\alpha$ 1-3(Neu5Ac $\alpha$ 2-3Gal $\beta$ 1-4GlcNAc $\beta$ 1-2Man $\alpha$ 1-6)Man $\beta$ 1-4GlcNAc $\beta$ 1-4GlcNAc $\beta$ -Sp12 | 255 | 23  | 12  | 9  |
| 243 | Neu5Ac $\alpha$ 2-6GalNAc $\beta$ 1-4GlcNAc $\beta$ -Sp0                                                                                                                                        | 255 | 140 | 70  | 55 |
| 135 | Gal $\beta$ 1-4(Fuca1-3)GlcNAc $\beta$ -Sp0                                                                                                                                                     | 252 | 71  | 35  | 28 |
| 280 | Gal $\beta$ 1-4[Fuca1-3][6OSO3]GlcNAc-Sp0                                                                                                                                                       | 252 | 78  | 39  | 31 |
| 59  | Fuca1-2Gal $\beta$ 1-3GalNAc $\beta$ 1-4(Neu5Ac $\alpha$ 2-3)Gal $\beta$ 1-4Glc $\beta$ -Sp0                                                                                                    | 243 | 127 | 63  | 52 |
| 288 | [6OSO3]Gal $\beta$ 1-4[6OSO3]GlcNAc $\beta$ -Sp0                                                                                                                                                | 242 | 114 | 57  | 47 |
| 45  | [6OSO3]Gal $\beta$ 1-4[6OSO3]Glc $\beta$ -Sp8                                                                                                                                                   | 240 | 78  | 39  | 33 |
| 202 | Neu5Ac $\alpha$ 2-3Gal $\beta$ 1-3GalNAc $\alpha$ -Sp8                                                                                                                                          | 239 | 48  | 24  | 20 |
| 129 | Gal $\beta$ 1-3GalNAc $\beta$ 1-4Gal $\beta$ 1-4Glc $\beta$ -Sp8                                                                                                                                | 239 | 43  | 22  | 18 |
| 84  | GalNAc $\alpha$ 1-3(Fuca1-2)Gal $\beta$ -Sp8                                                                                                                                                    | 236 | 82  | 41  | 35 |

|     |                                                                                                                                                                      |     |     |    |    |
|-----|----------------------------------------------------------------------------------------------------------------------------------------------------------------------|-----|-----|----|----|
| 189 | Man $\alpha$ 1-2Man $\alpha$ 1-2Man $\alpha$ 1-3Man $\alpha$ -Sp9                                                                                                    | 234 | 51  | 25 | 22 |
| 174 | GlcNAc $\beta$ 1-6(Gal $\beta$ 1-3)GalNAc $\alpha$ -Sp8                                                                                                              | 234 | 30  | 15 | 13 |
| 76  | Fuc $\alpha$ 1-3GlcNAc $\beta$ -Sp8                                                                                                                                  | 231 | 135 | 68 | 58 |
| 44  | [6OSO3]Gal $\beta$ 1-4GlcNAc $\beta$ -Sp8                                                                                                                            | 230 | 150 | 75 | 65 |
| 267 | [3OSO3]Gal $\beta$ 1-4[Fuc $\alpha$ 1-3][6OSO3]GlcNAc-Sp8                                                                                                            | 230 | 122 | 61 | 53 |
| 136 | Gal $\beta$ 1-4(Fuc $\alpha$ 1-3)GlcNAc $\beta$ -Sp8                                                                                                                 | 229 | 84  | 42 | 37 |
| 12  | $\alpha$ -L-Fuc-Sp9                                                                                                                                                  | 228 | 131 | 66 | 57 |
| 47  | [6OSO3]GlcNAc $\beta$ -Sp8                                                                                                                                           | 224 | 73  | 37 | 33 |
| 108 | Gal $\alpha$ 1-4(Fuc $\alpha$ 1-2)Gal $\beta$ 1-4GlcNAc $\beta$ -Sp8                                                                                                 | 222 | 105 | 53 | 47 |
| 17  | $\beta$ -D-Gal-Sp8                                                                                                                                                   | 220 | 77  | 38 | 35 |
| 258 | Neu5Gca2-3Gal $\beta$ 1-3GlcNAc $\beta$ -Sp0                                                                                                                         | 217 | 78  | 39 | 36 |
| 7   | $\alpha$ -D-Gal-Sp8                                                                                                                                                  | 217 | 62  | 31 | 29 |
| 260 | Neu5Gca2-3Gal $\beta$ 1-4GlcNAc $\beta$ -Sp0                                                                                                                         | 217 | 85  | 43 | 39 |
| 145 | Gal $\beta$ 1-4GlcNAc $\beta$ 1-3Gal $\beta$ 1-4(Fuc $\alpha$ 1-3)GlcNAc $\beta$ 1-3Gal $\beta$ 1-4(Fuc $\alpha$ 1-3)GlcNAc $\beta$ -Sp0                             | 216 | 102 | 51 | 47 |
| 232 | Neu5Aca2-3Gal $\beta$ 1-4(Fuc $\alpha$ 1-3)GlcNAc $\beta$ 1-3Gal $\beta$ -Sp8                                                                                        | 215 | 102 | 51 | 47 |
| 302 | GalNAc $\beta$ 1-3Gal $\beta$ -Sp8                                                                                                                                   | 214 | 83  | 42 | 39 |
| 311 | Man $\alpha$ 1-6Man $\beta$ -Sp10                                                                                                                                    | 208 | 77  | 39 | 37 |
| 137 | Gal $\beta$ 1-4(Fuc $\alpha$ 1-3)GlcNAc $\beta$ 1-4Gal $\beta$ 1-4(Fuc $\alpha$ 1-3)GlcNAc $\beta$ -Sp0                                                              | 208 | 84  | 42 | 41 |
| 158 | GlcNAc $\beta$ 1-2Gal $\beta$ 1-3GalNAc $\alpha$ -Sp8                                                                                                                | 206 | 119 | 60 | 58 |
| 229 | Neu5Aca2-3Gal $\beta$ 1-4(Fuc $\alpha$ 1-3)GlcNAc $\beta$ 1-3Gal $\beta$ 1-4(Fuc $\alpha$ 1-3)GlcNAc $\beta$ 1-3Gal $\beta$ 1-4(Fuc $\alpha$ 1-3)GlcNAc $\beta$ -Sp0 | 201 | 36  | 18 | 18 |
| 122 | Gal $\beta$ 1-3(Neu5Aca2-6)GalNAc $\alpha$ -Sp8                                                                                                                      | 200 | 63  | 32 | 32 |
| 281 | Gal $\beta$ 1-4[Fuc $\alpha$ 1-3][6OSO3]Glc-Sp0                                                                                                                      | 200 | 111 | 55 | 56 |
| 28  | [3OSO3]Gal $\beta$ 1-4Glc $\beta$ -Sp8                                                                                                                               | 199 | 55  | 27 | 27 |
| 34  | [3OSO3]Gal $\beta$ 1-4(Fuc $\alpha$ 1-3)GlcNAc $\beta$ -Sp8                                                                                                          | 199 | 63  | 31 | 32 |
| 219 | Neu5Aca2-3Gal $\beta$ 1-3(Neu5Aca2-3Gal $\beta$ 1-4)GlcNAc $\beta$ -Sp8                                                                                              | 199 | 68  | 34 | 34 |
| 263 | Neu5Gca2-6Gal $\beta$ 1-4GlcNAc $\beta$ -Sp0                                                                                                                         | 197 | 46  | 23 | 23 |
| 154 | Gal $\beta$ 1-4Glc $\beta$ -Sp0                                                                                                                                      | 197 | 98  | 49 | 50 |
| 187 | KDN $\alpha$ 2-3Gal $\beta$ 1-3GlcNAc $\beta$ -Sp0                                                                                                                   | 195 | 32  | 16 | 16 |
| 249 | Neu5Aca2-6Gal $\beta$ 1-4Glc $\beta$ -Sp0                                                                                                                            | 194 | 80  | 40 | 41 |
| 235 | Neu5Aca2-3Gal $\beta$ 1-4GlcNAc $\beta$ 1-3Gal $\beta$ 1-4GlcNAc $\beta$ 1-3Gal $\beta$ 1-4GlcNAc $\beta$ -Sp0                                                       | 194 | 125 | 63 | 65 |
| 23  | $\beta$ -GlcN(Gc)-Sp8                                                                                                                                                | 193 | 63  | 31 | 32 |
| 148 | Gal $\beta$ 1-4GlcNAc $\beta$ 1-3Gal $\beta$ 1-4Glc $\beta$ -Sp0                                                                                                     | 186 | 151 | 76 | 81 |

|     |                                                                                                                                                                                                 |     |     |    |    |
|-----|-------------------------------------------------------------------------------------------------------------------------------------------------------------------------------------------------|-----|-----|----|----|
| 318 | Neu5Ac $\alpha$ 2-3Gal $\beta$ 1-4GlcNAc $\beta$ 1-2Man $\alpha$ 1-3(Neu5Ac $\alpha$ 2-6Gal $\beta$ 1-4GlcNAc $\beta$ 1-2Man $\alpha$ 1-6)Man $\beta$ 1-4GlcNAc $\beta$ 1-4GlcNAc $\beta$ -Sp12 | 186 | 127 | 63 | 68 |
| 230 | Neu5Ac $\alpha$ 2-3Gal $\beta$ 1-4(Fuca1-3)GlcNAc $\beta$ -Sp0                                                                                                                                  | 183 | 27  | 13 | 15 |
| 115 | Gal $\beta$ 1-3(Fuca1-4)GlcNAc $\beta$ 1-3Gal $\beta$ 1-4(Fuca1-3)GlcNAc $\beta$ -Sp0                                                                                                           | 183 | 75  | 38 | 41 |
| 54  | Neu5Ac $\alpha$ 2-6Gal $\beta$ 1-4GlcNAc $\beta$ 1-2Man $\alpha$ 1-3(Neu5Ac $\alpha$ 2-6Gal $\beta$ 1-4GlcNAc $\beta$ 1-2Man $\alpha$ 1-6)Man $\beta$ 1-4GlcNAc $\beta$ 1-4GlcNAc $\beta$ -Sp8  | 183 | 69  | 34 | 38 |
| 40  | [4OSO3]Gal $\beta$ 1-4GlcNAc $\beta$ -Sp8                                                                                                                                                       | 182 | 71  | 36 | 39 |
| 133 | Gal $\beta$ 1-3GlcNAc $\beta$ -Sp0                                                                                                                                                              | 182 | 99  | 50 | 54 |
| 292 | Gal $\beta$ 1-3GalNAc $\alpha$ -Sp16                                                                                                                                                            | 181 | 141 | 70 | 78 |
| 226 | Neu5Ac $\alpha$ 2-3Gal $\beta$ 1-3GlcNAc $\beta$ -Sp8                                                                                                                                           | 181 | 133 | 66 | 73 |
| 287 | [3OSO3][4OSO3]Gal $\beta$ 1-4GlcNAc $\beta$ -SpSp0                                                                                                                                              | 181 | 55  | 27 | 30 |
| 20  | $\beta$ -GalNAc-Sp8                                                                                                                                                                             | 180 | 83  | 41 | 46 |
| 114 | Gal $\beta$ 1-2Gal $\beta$ -Sp8                                                                                                                                                                 | 180 | 112 | 56 | 62 |
| 224 | NeuAc $\alpha$ 2-3Gal $\beta$ 1-3GlcNAc $\beta$ 1-3Gal $\beta$ 1-4GlcNAc $\beta$ -Sp0                                                                                                           | 179 | 111 | 56 | 62 |
| 120 | Gal $\beta$ 1-3(Gal $\beta$ 1-4GlcNAc $\beta$ 1-6)GalNAc $\alpha$ -Sp8                                                                                                                          | 178 | 76  | 38 | 43 |
| 74  | Fuca1-2Gal $\beta$ -Sp8                                                                                                                                                                         | 176 | 96  | 48 | 55 |
| 162 | GlcNAc $\beta$ 1-3Gal $\beta$ -Sp8                                                                                                                                                              | 174 | 114 | 57 | 66 |
| 246 | Neu5Ac $\alpha$ 2-6Gal $\beta$ 1-4GlcNAc $\beta$ -Sp8                                                                                                                                           | 171 | 120 | 60 | 70 |
| 113 | Gal $\alpha$ 1-6Glc $\beta$ -Sp8                                                                                                                                                                | 170 | 87  | 43 | 51 |
| 88  | GalNAc $\beta$ 1-3GalNAc $\alpha$ -Sp8                                                                                                                                                          | 170 | 134 | 67 | 79 |
| 271 | Fuca1-2[6OSO3]Gal $\beta$ 1-4[6OSO3]Glc-Sp0                                                                                                                                                     | 170 | 35  | 17 | 20 |
| 83  | GalNAc $\alpha$ 1-3(Fuca1-2)Gal $\beta$ 1-4Glc $\beta$ -Sp0                                                                                                                                     | 168 | 73  | 36 | 43 |
| 80  | GalNAc $\alpha$ 1-3(Fuca1-2)Gal $\beta$ 1-4(Fuca1-3)GlcNAc $\beta$ -Sp0                                                                                                                         | 168 | 53  | 26 | 31 |
| 276 | Gal $\beta$ 1-3(GlcNAc $\beta$ 1-6)GalNAc-Sp14                                                                                                                                                  | 166 | 80  | 40 | 48 |
| 24  | (Gal $\beta$ 1-4GlcNAc $\beta$ )2-3,6-GalNAc $\alpha$ -Sp8                                                                                                                                      | 166 | 89  | 44 | 53 |
| 269 | Fuca1-2[6OSO3]Gal $\beta$ 1-4GlcNAc-Sp0                                                                                                                                                         | 166 | 99  | 49 | 59 |
| 161 | GlcNAc $\beta$ 1-3GalNAc $\alpha$ -Sp8                                                                                                                                                          | 166 | 78  | 39 | 47 |
| 26  | [3OSO3][6OSO3]Gal $\beta$ 1-4[6OSO3]GlcNAc $\beta$ -Sp0                                                                                                                                         | 164 | 80  | 40 | 49 |
| 199 | Neu5Ac $\alpha$ 2-6Gal $\beta$ 1-4GlcNAc $\beta$ 1-2Man $\alpha$ 1-3(Neu5Ac $\alpha$ 2-3Gal $\beta$ 1-4GlcNAc $\beta$ 1-2Man $\alpha$ 1-6)Man $\beta$ 1-4GlcNAc $\beta$ 1-4GlcNAc $\beta$ -Sp12 | 164 | 99  | 49 | 60 |
| 6   | Neu5Ac $\alpha$ 2-6Gal $\beta$ 1-4GlcNAc $\beta$ 1-2Man $\alpha$ 1-3(Neu5Ac $\alpha$ 2-6Gal $\beta$ 1-4GlcNAc $\beta$ 1-2Man $\alpha$ 1-6)Man $\beta$ 1-4GlcNAc $\beta$ 1-4GlcNAc $\beta$ -Sp12 | 162 | 82  | 41 | 51 |
| 39  | [4OSO3][6OSO3]Gal $\beta$ 1-4GlcNAc $\beta$ -Sp0                                                                                                                                                | 161 | 45  | 22 | 28 |

|     |                                                                                           |     |     |    |    |
|-----|-------------------------------------------------------------------------------------------|-----|-----|----|----|
| 134 | Galβ1-3GlcNAcβ-Sp8                                                                        | 161 | 31  | 15 | 19 |
| 32  | [3OSO3]Galβ1-3GalNAcα-Sp8                                                                 | 160 | 63  | 31 | 39 |
| 251 | Neu5Acα2-6Galβ-Sp8                                                                        | 158 | 79  | 39 | 50 |
| 217 | Neu5Acα2-3Galβ1-3(Fuca1-4)GlcNAcβ-Sp8                                                     | 157 | 62  | 31 | 39 |
| 237 | Neu5Acα2-3Galβ1-4GlcNAcβ-Sp8                                                              | 156 | 56  | 28 | 36 |
| 299 | Galβ1-4GlcNAcβ1-6Galβ1-4GlcNAcβ-Sp0                                                       | 156 | 79  | 39 | 50 |
| 184 | GlcAβ-Sp8                                                                                 | 156 | 44  | 22 | 28 |
| 75  | Fuca1-3GlcNAcβ-Sp8                                                                        | 154 | 84  | 42 | 54 |
| 264 | Neu5Gcα-Sp8                                                                               | 153 | 46  | 23 | 30 |
| 31  | [3OSO3]Galβ1-3(Fuca1-4)GlcNAcβ-Sp8                                                        | 153 | 115 | 58 | 76 |
| 295 | Galβ1-4GlcNAcβ1-2Mana1-3(Neu5Acα2-6Galβ1-4GlcNAcβ1-2Mana1-6)Manβ1-4GlcNAcβ1-4GlcNAcβ-Sp12 | 152 | 98  | 49 | 64 |
| 118 | Galβ1-3(Fuca1-4)GlcNAc-Sp8                                                                | 151 | 23  | 12 | 15 |
| 256 | Galβ1-4GlcNAcβ1-2Mana1-3(Neu5Acα2-6Galβ1-4GlcNAcβ1-2Mana1-6)Manβ1-4GlcNAcβ1-4GlcNAcβ-Sp21 | 150 | 56  | 28 | 37 |
| 2   | Neu5Acα2-8Neu5Acβ-Sp17                                                                    | 149 | 128 | 64 | 86 |
| 182 | G-ol-Sp8                                                                                  | 148 | 62  | 31 | 42 |
| 132 | Galβ1-3GlcNAcβ1-3Galβ1-4Glcβ-Sp10                                                         | 148 | 55  | 27 | 37 |
| 188 | KDNα2-3Galβ1-4GlcNAcβ-Sp0                                                                 | 148 | 100 | 50 | 68 |
| 185 | GlcAβ1-3Galβ-Sp8                                                                          | 148 | 74  | 37 | 50 |
| 140 | Galβ1-4[6OSO3]Glcβ-Sp8                                                                    | 147 | 99  | 49 | 67 |
| 231 | Neu5Acα2-3Galβ1-4(Fuca1-3)GlcNAcβ-Sp8                                                     | 146 | 24  | 12 | 16 |
| 203 | NeuAca2-8NeuAca2-8NeuAca2-8NeuAca2-3(GalNAcβ1-4)Galβ1-4Glcβ-Sp0                           | 146 | 60  | 30 | 41 |
| 138 | Galβ1-4(Fuca1-3)GlcNAcβ1-4Galβ1-4(Fuca1-3)GlcNAcβ1-4Galβ1-4(Fuca1-3)GlcNAcβ-Sp0           | 146 | 24  | 12 | 17 |
| 178 | Glcα1-4Glcα-Sp8                                                                           | 145 | 87  | 43 | 60 |
| 90  | GalNAcβ1-3Galα1-4Galβ1-4GlcNAcβ-Sp0                                                       | 144 | 47  | 24 | 33 |
| 37  | [3OSO3]Galβ1-4GlcNAcβ-Sp8                                                                 | 143 | 34  | 17 | 24 |
| 141 | Galβ1-4GalNAcα1-3(Fuca1-2)Galβ1-4GlcNAcβ-Sp8                                              | 143 | 52  | 26 | 37 |
| 49  | 9NAcNeu5Acα2-6Galβ1-4GlcNAcβ-Sp8                                                          | 141 | 90  | 45 | 64 |
| 186 | GlcAβ1-6Galβ-Sp8                                                                          | 140 | 30  | 15 | 22 |
| 268 | [3OSO3]Galβ1-4[Fuca1-3]GlcNAc-Sp0                                                         | 140 | 91  | 46 | 65 |
| 261 | Neu5Gcα2-3Galβ1-4Glcβ-Sp0                                                                 | 137 | 73  | 37 | 53 |
| 209 | Neu5Acα2-3(GalNAcβ1-4)Galβ1-4GlcNAcβ-Sp0                                                  | 137 | 124 | 62 | 91 |
| 89  | GalNAcβ1-3(Fuca1-2)Galβ-Sp8                                                               | 135 | 83  | 42 | 62 |

|     |                                                       |     |     |    |     |
|-----|-------------------------------------------------------|-----|-----|----|-----|
| 35  | [3OSO3]Galβ1-4[6OSO3]GlcNAcβ-Sp8                      | 135 | 72  | 36 | 53  |
| 177 | Glcα1-4Glcβ-Sp8                                       | 134 | 55  | 27 | 41  |
| 101 | Galα1-3GalNAcα-Sp8                                    | 134 | 136 | 68 | 102 |
| 56  | Fucα1-2Galβ1-3GalNAcβ1-3Galα1-4Galβ1-4Glcβ-Sp9        | 133 | 73  | 36 | 55  |
| 228 | Neu5Acα2-3Galβ1-4(Fuca1-3)(6OSO3)GlcNAcβ-Sp8          | 133 | 64  | 32 | 48  |
| 183 | GlcAa-Sp8                                             | 132 | 88  | 44 | 67  |
| 274 | Galβ1-3(Fuca1-4)GlcNAcβ1-3Galβ1-3(Fuca1-4)GlcNAcβ-Sp0 | 132 | 83  | 41 | 63  |
| 121 | Galβ1-3(GlcNAcβ1-6)GalNAcα-Sp8                        | 130 | 50  | 25 | 38  |
| 236 | Neu5Acα2-3Galβ1-4GlcNAcβ-Sp0                          | 130 | 75  | 38 | 58  |
| 48  | 9NAcNeu5Acα-Sp8                                       | 130 | 60  | 30 | 46  |
| 11  | α-L-Fuc-Sp8                                           | 128 | 105 | 52 | 82  |
| 22  | β-GlcNAc-Sp8                                          | 127 | 121 | 60 | 95  |
| 19  | β-D-Man-Sp8                                           | 126 | 133 | 66 | 105 |
| 1   | Neu5Acα2-8Neu5Acα-Sp8                                 | 126 | 50  | 25 | 39  |
| 123 | Galβ1-3(Neu5Acβ2-6)GalNAcα-Sp8                        | 126 | 44  | 22 | 35  |
| 255 | Neu5Acβ2-6Galβ1-4GlcNAcβ-Sp8                          | 125 | 42  | 21 | 33  |
| 257 | Neu5Gca2-3Galβ1-3(Fuca1-4)GlcNAcβ-Sp0                 | 125 | 60  | 30 | 48  |
| 266 | [3OSO3]Galβ1-4(Fuca1-3)Glc-Sp0                        | 121 | 71  | 36 | 59  |
| 234 | Neu5Acα2-3Galβ1-4GlcNAcβ1-3Galβ1-4(Fuca1-3)GlcNAc-Sp0 | 120 | 45  | 22 | 37  |
| 221 | Neu5Acα2-3Galβ1-3(Neu5Acα2-6)GalNAcα-Sp8              | 120 | 40  | 20 | 33  |
| 124 | Galβ1-3(Neu5Acα2-6)GlcNAcβ1-4Galβ1-4Glcβ-Sp10         | 118 | 53  | 27 | 45  |
| 316 | Neu5Acα2-3Galβ1-3(Neu5Acα2-6)GalNAc-Sp14              | 118 | 52  | 26 | 44  |
| 298 | Galβ1-4GlcNAcα1-6Galβ1-4GlcNAcβ-Sp0                   | 117 | 74  | 37 | 63  |
| 200 | Manβ1-4GlcNAcβ-Sp0                                    | 117 | 65  | 32 | 56  |
| 273 | Fucα1-2-Galβ1-4[6OSO3]Glc-Sp0                         | 116 | 48  | 24 | 42  |
| 240 | Neu5Acα2-3Galβ1-4Glcβ-Sp8                             | 116 | 37  | 19 | 32  |
| 21  | β-GlcNAc-Sp0                                          | 114 | 66  | 33 | 58  |
| 43  | [6OSO3]Galβ1-4Glcβ-Sp8                                | 112 | 38  | 19 | 34  |
| 206 | Neu5Acα2-8Neu5Acα2-3(GalNAcβ1-4)Galβ1-4Glcβ-Sp0       | 111 | 96  | 48 | 86  |
| 181 | Glcβ1-6Glcβ-Sp8                                       | 111 | 45  | 22 | 40  |
| 131 | Galβ1-3GlcNAcβ1-3Galβ1-4GlcNAcβ-Sp0                   | 110 | 55  | 28 | 50  |
| 214 | Neu5Acα2-3GalNAcα-Sp8                                 | 110 | 15  | 7  | 13  |



|     |                                                        |     |    |    |    |
|-----|--------------------------------------------------------|-----|----|----|----|
| 294 | Galβ1-3Galβ1-4GlcNAcβ-Sp8                              | 110 | 95 | 47 | 86 |
| 291 | Galα1-3GalNAcα-Sp16                                    | 110 | 85 | 43 | 78 |
| 223 | Neu5Acα2-3Galβ1-3GalNAcβ1-3Galα1-4Galβ1-4Glcβ-Sp0      | 109 | 24 | 12 | 22 |
| 317 | Neu5Acα2-3Galβ1-3GalNAc-Sp14                           | 109 | 60 | 30 | 55 |
| 242 | Neu5Acα2-6GalNAcα-Sp8                                  | 109 | 63 | 31 | 58 |
| 179 | Glcα1-6Glcα1-6Glcβ-Sp8                                 | 109 | 52 | 26 | 47 |
| 233 | Neu5Acα2-3Galβ1-4(Fuca1-3)GlcNAcβ1-3Galβ1-4GlcNAcβ-Sp8 | 105 | 49 | 24 | 46 |
| 102 | Galα1-3GalNAcβ-Sp8                                     | 105 | 75 | 38 | 71 |
| 180 | Glcβ1-4Glcβ-Sp8                                        | 104 | 55 | 28 | 53 |
| 152 | Galβ1-4GlcNAcβ-Sp0                                     | 103 | 54 | 27 | 52 |
| 248 | Neu5Acα2-6Galβ1-4GlcNAcβ1-3Galβ1-4GlcNAcβ-Sp0          | 103 | 28 | 14 | 27 |
| 33  | [3OSO3]Galβ1-3GlcNAcβ-Sp8                              | 103 | 29 | 15 | 28 |
| 29  | [3OSO3]Galβ1-4(6OSO3)Glcβ-Sp0                          | 101 | 17 | 9  | 17 |
| 147 | Galβ1-4GlcNAcβ1-3Galβ1-4GlcNAcβ-Sp0                    | 99  | 52 | 26 | 52 |
| 227 | Neu5Acα2-3Galβ1-4[6OSO3]GlcNAcβ-Sp8                    | 98  | 59 | 29 | 60 |
| 259 | Neu5Gca2-3Galβ1-4(Fuca1-3)GlcNAcβ-Sp0                  | 97  | 40 | 20 | 41 |
| 16  | β-Neu5Ac-Sp8                                           | 96  | 45 | 22 | 46 |
| 244 | Neu5Acα2-6Galβ1-4[6OSO3]GlcNAcβ-Sp8                    | 96  | 30 | 15 | 32 |
| 212 | Neu5Acα2-3(Neu5Acα2-3Galβ1-3GalNAcβ1-4)Galβ1-4Glcβ-Sp0 | 96  | 95 | 47 | 99 |
| 55  | Fuca1-2Galβ1-3GalNAcβ1-3Galα-Sp9                       | 95  | 59 | 30 | 62 |
| 208 | Neu5Acα2-3(6-O-Su)Galβ1-4(Fuca1-3)GlcNAcβ-Sp8          | 95  | 27 | 14 | 29 |
| 285 | Neu5Acα2-3Galβ1-4GlcNAcβ1-3Galβ1-3GlcNAcβ-Sp0          | 94  | 19 | 10 | 20 |
| 278 | Galβ1-3GalNAc-Sp14                                     | 94  | 60 | 30 | 64 |
| 30  | [3OSO3]Galβ1-4(6OSO3)Glcβ-Sp8                          | 93  | 81 | 40 | 87 |
| 225 | Neu5Acα2-3Galβ1-3GlcNAcβ-Sp0                           | 93  | 55 | 28 | 59 |
| 303 | GlcAβ1-3GlcNAcβ-Sp8                                    | 92  | 61 | 31 | 67 |
| 215 | Neu5Acα2-3GalNAcβ1-4GlcNAcβ-Sp0                        | 92  | 54 | 27 | 59 |
| 127 | Galβ1-3GalNAcβ1-3Galα1-4Galβ1-4Glcβ-Sp0                | 91  | 49 | 25 | 54 |
| 4   | Neu5Gcβ2-6Galβ1-4GlcNAc-Sp8                            | 91  | 35 | 18 | 39 |
| 18  | β-D-Glc-Sp8                                            | 90  | 44 | 22 | 49 |
| 153 | Galβ1-4GlcNAcβ-Sp8                                     | 90  | 47 | 23 | 52 |
| 216 | Neu5Acα2-3Galβ1-3(6OSO3)GlcNAc-Sp8                     | 89  | 49 | 25 | 55 |

|     |                                                                                                     |    |    |    |     |
|-----|-----------------------------------------------------------------------------------------------------|----|----|----|-----|
| 73  | Fuca1-2Galβ1-4Glcβ-Sp0                                                                              | 88 | 60 | 30 | 68  |
| 254 | Neu5Acβ2-6GalNAcα-Sp8                                                                               | 87 | 60 | 30 | 69  |
| 3   | Neu5Acα2-8Neu5Acα2-8Neu5Acβ-Sp8                                                                     | 87 | 49 | 24 | 56  |
| 283 | Galβ1-4GlcNAcβ1-3Galβ1-3GlcNAcβ-Sp0                                                                 | 86 | 6  | 3  | 7   |
| 211 | Neu5Acα2-3(GalNAcβ1-4)Galβ1-4Glcβ-Sp0                                                               | 84 | 39 | 20 | 47  |
| 239 | Neu5Acα2-3Galβ1-4Glcβ-Sp0                                                                           | 81 | 81 | 40 | 100 |
| 116 | Galβ1-3(Fuca1-4)GlcNAcβ1-3Galβ1-4GlcNAcβ-Sp0                                                        | 81 | 25 | 13 | 32  |
| 119 | Galβ1-3(Fuca1-4)GlcNAcβ-Sp8                                                                         | 81 | 63 | 31 | 78  |
| 41  | 6-H2PO3Mana-Sp8                                                                                     | 80 | 64 | 32 | 80  |
| 282 | Galβ1-4(Fuca1-3)GlcNAcβ1-3Galβ1-3(Fuca1-4)GlcNAcβ-Sp0                                               | 80 | 39 | 19 | 49  |
| 25  | GlcNAcβ1-3(GlcNAcβ1-4)(GlcNAcβ1-6)GlcNAc-Sp8                                                        | 80 | 18 | 9  | 22  |
| 315 | Neu5Acα2-3Galβ1-3(Neu5Acα2-3Galβ1-4GlcNAcβ1-6)GalNAc-Sp14                                           | 80 | 21 | 11 | 26  |
| 279 | Galβ1-3GlcNAcβ1-3Galβ1-3GlcNAcβ-Sp0                                                                 | 79 | 41 | 20 | 52  |
| 38  | [3OSO3]Galβ-Sp8                                                                                     | 79 | 18 | 9  | 22  |
| 78  | Fucβ1-3GlcNAcβ-Sp8                                                                                  | 78 | 34 | 17 | 43  |
| 306 | GlcNAcβ1-3Man-Sp10                                                                                  | 77 | 27 | 13 | 35  |
| 42  | [6OSO3]Galβ1-4Glcβ-Sp0                                                                              | 77 | 92 | 46 | 120 |
| 144 | Galβ1-4GlcNAcβ1-3GalNAcα-Sp8                                                                        | 76 | 19 | 9  | 25  |
| 27  | [3OSO3][6OSO3]Galβ1-4GlcNAcβ-Sp0                                                                    | 76 | 41 | 20 | 54  |
| 117 | Galβ1-3(Fuca1-4)GlcNAc-Sp0                                                                          | 75 | 8  | 4  | 11  |
| 220 | Neu5Acα2-3Galβ1-3[6OSO3]GalNAcα-Sp8                                                                 | 73 | 38 | 19 | 53  |
| 296 | Galβ1-4GlcNAcβ1-3(Galβ1-4GlcNAcβ1-6)Galβ1-4GlcNAc-Sp0                                               | 72 | 23 | 12 | 32  |
| 207 | Neu5Acα2-8Neu5Acα2-8Neu5Acα-Sp8                                                                     | 72 | 40 | 20 | 55  |
| 60  | Fuca1-2Galβ1-3GalNAcβ1-4(Neu5Acα2-3)Galβ1-4Glcβ-Sp9                                                 | 71 | 25 | 13 | 35  |
| 245 | Neu5Acα2-6Galβ1-4GlcNAcβ-Sp0                                                                        | 71 | 35 | 17 | 49  |
| 149 | Galβ1-4GlcNAcβ1-3Galβ1-4Glcβ-Sp8                                                                    | 71 | 82 | 41 | 116 |
| 8   | α-D-Glc-Sp8                                                                                         | 70 | 70 | 35 | 100 |
| 277 | Galβ1-3-(Neu5Aa2-3Galβ1-4GlcNAcβ1-6)GalNAc-Sp14                                                     | 67 | 44 | 22 | 65  |
| 9   | α-D-Man-Sp8                                                                                         | 67 | 27 | 13 | 40  |
| 125 | Galβ1-3GalNAcα-Sp8                                                                                  | 66 | 99 | 50 | 150 |
| 53  | Neu5Acα2-6Galβ1-4GlcNAcβ1-2Mana1-3(Neu5Acα2-6Galβ1-4GlcNAcβ1-2Mana1-6)Manβ1-4GlcNAcβ1-4GlcNAcβ-Sp13 | 66 | 32 | 16 | 49  |

|     |                                                                                                              |    |    |    |     |
|-----|--------------------------------------------------------------------------------------------------------------|----|----|----|-----|
| 210 | Neu5Ac $\alpha$ 2-3(GalNAc $\beta$ 1-4)Gal $\beta$ 1-4GlcNAc $\beta$ -Sp8                                    | 64 | 25 | 12 | 39  |
| 146 | Gal $\beta$ 1-4GlcNAc $\beta$ 1-3Gal $\beta$ 1-4GlcNAc $\beta$ 1-3Gal $\beta$ 1-4GlcNAc $\beta$ -Sp0         | 63 | 26 | 13 | 42  |
| 46  | NeuAc $\alpha$ 2-3[6OSO3]Gal $\beta$ 1-4GlcNAc $\beta$ -Sp8                                                  | 63 | 57 | 29 | 91  |
| 13  | $\alpha$ -L-Rh $\alpha$ -Sp8                                                                                 | 63 | 29 | 14 | 46  |
| 275 | Gal $\beta$ 1-3-(Gal $\beta$ 1-4GlcNAc $\beta$ 1-6)GalNAc-Sp14                                               | 62 | 35 | 18 | 57  |
| 284 | Neu5Ac $\alpha$ 2-3Gal $\beta$ 1-3GlcNAc $\beta$ 1-3Gal $\beta$ 1-3GlcNAc $\beta$ -Sp0                       | 60 | 26 | 13 | 43  |
| 289 | 6-H2PO3Glc $\beta$ -Sp10                                                                                     | 57 | 46 | 23 | 81  |
| 213 | Neu5Ac $\alpha$ 2-3(Neu5Ac $\alpha$ 2-6)GalNAc $\alpha$ -Sp8                                                 | 56 | 26 | 13 | 46  |
| 204 | Neu5Ac $\alpha$ 2-8Neu5Ac $\alpha$ 2-8Neu5Ac $\alpha$ 2-3(GalNAc $\beta$ 1-4)Gal $\beta$ 1-4Glc $\beta$ -Sp0 | 55 | 4  | 2  | 7   |
| 15  | $\alpha$ -Neu5Ac-Sp11                                                                                        | 51 | 41 | 20 | 79  |
| 253 | Neu5Ac $\alpha$ 2-8Neu5Ac $\alpha$ 2-3Gal $\beta$ 1-4Glc $\beta$ -Sp0                                        | 48 | 36 | 18 | 74  |
| 286 | [3OSO3]Gal $\beta$ 1-4[6OSO3]GlcNAc $\beta$ -Sp0                                                             | 46 | 29 | 14 | 63  |
| 262 | Neu5Gc $\alpha$ 2-6GalNAc $\alpha$ -Sp0                                                                      | 44 | 18 | 9  | 41  |
| 252 | Neu5Ac $\alpha$ 2-8Neu5Ac $\alpha$ -Sp8                                                                      | 41 | 8  | 4  | 19  |
| 205 | Neu5Ac $\alpha$ 2-8Neu5Ac $\alpha$ 2-8Neu5Ac $\alpha$ 2-3Gal $\beta$ 1-4Glc $\beta$ -Sp0                     | 40 | 8  | 4  | 19  |
| 238 | Neu5Ac $\alpha$ 2-3Gal $\beta$ 1-4GlcNAc $\beta$ 1-3Gal $\beta$ 1-4GlcNAc $\beta$ -Sp0                       | 33 | 59 | 29 | 176 |
| 250 | Neu5Ac $\alpha$ 2-6Gal $\beta$ 1-4Glc $\beta$ -Sp8                                                           | 30 | 26 | 13 | 88  |
| 77  | Fuc $\alpha$ 1-4GlcNAc $\beta$ -Sp8                                                                          | 24 | 27 | 14 | 112 |

**Supplementary Table S2:** List of best hits ( $E < 0.01$ ) of a BLASTp search using the deduced sequence of LECEEA as a query.

| Proteins with a <b>single domain</b> equivalent to EEA               |                                                                              | Score                | E-value |
|----------------------------------------------------------------------|------------------------------------------------------------------------------|----------------------|---------|
| <a href="#">ref NP_001060668.1</a>                                   | Os07g0684000 [Oryza sativa] (=osr40g3)                                       | <a href="#">129</a>  | 5e-29   |
| <a href="#">emb CAO23507.1</a>                                       | unnamed protein product [Vitis vinifera]                                     | <a href="#">129</a>  | 7e-29   |
| <a href="#">gb AA444603.1</a>                                        | stress responsive protein [Triticum aestivum]                                | <a href="#">126</a>  | 3e-28   |
| <a href="#">gb ABK95474.1</a>                                        | unknown [Populus trichocarpa]                                                | <a href="#">120</a>  | 3e-26   |
| <a href="#">ref NP_565899.1</a>                                      | hydroxyproline-rich glycoprotein family<br>Arabidopsis thaliana ((At2g39050) | <a href="#">120</a>  | 4e-26   |
| <a href="#">ref NP_001041764.1</a>                                   | Os01g0104400 [Oryza sativa (japonica cult...                                 | <a href="#">107</a>  | 2e-22   |
| <a href="#">gb ABK27004.1</a>                                        | unknown [Picea sitchensis]                                                   | <a href="#">100</a>  | 3e-20   |
| <a href="#">gb ABK22768.1</a>                                        | unknown [Picea sitchensis]                                                   | <a href="#">99.0</a> | 8e-20   |
| <a href="#">gb ABK23910.1</a>                                        | unknown [Picea sitchensis]                                                   | <a href="#">97.1</a> | 3e-19   |
| <a href="#">gb EDQ82581.1</a>                                        | predicted protein [Physcomitrella patens subsp. p                            | <a href="#">94.7</a> | 2e-18   |
| <a href="#">gb EDQ69990.1</a>                                        | predicted protein [Physcomitrella patens subsp. p                            | <a href="#">94.4</a> | 2e-18   |
| <a href="#">gb EAY89839.1</a>                                        | hypothetical protein OsI_011072 [Oryza sativa ...                            | <a href="#">92.0</a> | 9e-18   |
| <a href="#">gb ABK23307.1</a>                                        | unknown [Picea sitchensis]                                                   | <a href="#">87.4</a> | 3e-16   |
| <a href="#">gb ABK21966.1</a>                                        | unknown [Picea sitchensis]                                                   | <a href="#">86.7</a> | 4e-16   |
| <a href="#">gb ABK22123.1</a>                                        | unknown [Picea sitchensis] >gb ABK27146.1  unk...                            | <a href="#">85.9</a> | 7e-16   |
| <a href="#">gb ABK24175.1</a>                                        | unknown [Picea sitchensis] >gb ABK27037.1  unk...                            | <a href="#">84.7</a> | 1e-15   |
| <a href="#">gb EDQ73918.1</a>                                        | predicted protein [Physcomitrella patens subsp. p                            | <a href="#">60.5</a> | 3e-08   |
| <a href="#">emb CAH59433.1</a>                                       | lectin-like protein 1 [Plantago major]                                       | <a href="#">58.9</a> | 9e-08   |
| <a href="#">emb CAH59435.1</a>                                       | lectin-like protein 2 [Plantago major]                                       | <a href="#">56.2</a> | 5e-07   |
| Proteins with <b>two in tandem arrayed domains</b> equivalent to EEA |                                                                              |                      |         |
| <a href="#">ref NP_001060666.1</a>                                   | Os07g0683600 [Oryza sativa (japonica cult...                                 | <a href="#">119</a>  | 8e-26   |
| <a href="#">ref NP_001060667.1</a>                                   | Os07g0683900 [Oryza sativa (japonica cult...                                 | <a href="#">116</a>  | 4e-25   |
| <a href="#">ref NP_001049995.1</a>                                   | Os03g0327600 [Oryza sativa (japonica cult...                                 | <a href="#">114</a>  | 2e-24   |
| <a href="#">gb EDQ82427.1</a>                                        | predicted protein [Physcomitrella patens subsp. p                            | <a href="#">102</a>  | 7e-21   |
| <a href="#">gb ABK25355.1</a>                                        | unknown [Picea sitchensis]                                                   | <a href="#">102</a>  | 9e-21   |
| <a href="#">gb ABK24374.1</a>                                        | unknown [Picea sitchensis]                                                   | <a href="#">96.3</a> | 5e-19   |

**Supplementary Table S3:** List of top 50 hits of a tBLASTn search using the deduced sequence of LECEEA as a query (EST database).

| Proteins with a single domain equivalent to EEA | Score                                             | E-value                   |
|-------------------------------------------------|---------------------------------------------------|---------------------------|
| <a href="#">gb DV449251.1</a>                   | CV01027A2A02.f1 CV01-normalized library Maniho... | <a href="#">137</a> 3e-31 |
| <a href="#">gb CA800954.1</a>                   | sau22c12.y1 Gm-cl062 Glycine max cDNA clone SO... | <a href="#">134</a> 2e-30 |
| <a href="#">gb EV240086.1</a>                   | VV_PED0010g08.bl Vitis vinifera cv. perlette L... | <a href="#">134</a> 2e-30 |
| <a href="#">gb BM890680.1</a>                   | sam06f06.y1 Gm-cl063 Glycine max cDNA clone SO... | <a href="#">134</a> 2e-30 |
| <a href="#">gb EC987124.1</a>                   | WIN1129.C21_M02 Muscat Hamburg pre-veraison be... | <a href="#">134</a> 3e-30 |
| <a href="#">gb CN141603.1</a>                   | OX1_52_E09.g1_A002 Oxidatively-stressed leaves... | <a href="#">133</a> 4e-30 |
| <a href="#">gb EV240087.1</a>                   | VV_PED0010g08.g1 Vitis vinifera cv. perlette L... | <a href="#">132</a> 7e-30 |
| <a href="#">gb DN141919.1</a>                   | 5036_F02_L03 Switchgrass crown cDNA library Pa... | <a href="#">132</a> 9e-30 |
| <a href="#">gb CX635247.1</a>                   | UCRPT02_10F01_b Poncirus trifoliata Roots with... | <a href="#">132</a> 1e-29 |
| <a href="#">gb CD573822.1</a>                   | UCRPT01_02_D04_T7 Poncirus trifoliata CTV-chal... | <a href="#">132</a> 1e-29 |
| <a href="#">gb CV705291.1</a>                   | UCRPT01_0006K15_f Poncirus trifoliata CTV-chal... | <a href="#">132</a> 1e-29 |
| <a href="#">gb DW224105.1</a>                   | GH_HYPS_01-01-04R_H12_InvR_13Apr04_082_F Stem ... | <a href="#">132</a> 1e-29 |
| <a href="#">gb CX635248.1</a>                   | UCRPT02_10F01_g Poncirus trifoliata Roots with... | <a href="#">132</a> 1e-29 |
| <a href="#">gb CX047385.1</a>                   | UCRCS09_13G12_b Ruby Orange Developing Seed cd... | <a href="#">132</a> 1e-29 |
| <a href="#">gb CV708290.1</a>                   | UCRPT01_0011B11_f Poncirus trifoliata CTV-chal... | <a href="#">132</a> 1e-29 |
| <a href="#">gb CN187922.1</a>                   | UCRCS05_0005D18_f Washington Navel Orange Stor... | <a href="#">131</a> 1e-29 |
| <a href="#">gb CN186672.1</a>                   | UCRCS05_0003E09_f Washington Navel Orange Stor... | <a href="#">131</a> 2e-29 |
| <a href="#">gb CX667274.1</a>                   | UCRCP01_030_C07_T3 Swingle citrumelo nematode-... | <a href="#">131</a> 2e-29 |
| <a href="#">gb CA162130.1</a>                   | SCQSRZ3037H04.b RZ3 Saccharum officinarum cDNA... | <a href="#">131</a> 2e-29 |
| <a href="#">gb CA109368.1</a>                   | SCSGHR1070B01.b HR1 Saccharum officinarum cDNA... | <a href="#">131</a> 2e-29 |
| <a href="#">gb EE021146.2</a>                   | ZM_BFc0074M13.r ZM_BFc Zea mays cDNA clone ZM_... | <a href="#">131</a> 2e-29 |
| <a href="#">dbj CJ767152.1</a>                  | CJ767152 Ipomoea nil shoot 8-days old seedlin...  | <a href="#">131</a> 2e-29 |
| <a href="#">gb CD432710.1</a>                   | ETH1_25_E11.g1_A002 Ethylene-treated seedlings... | <a href="#">131</a> 2e-29 |
| <a href="#">gb CX050821.1</a>                   | UCRCS09_34G05_b Ruby Orange Developing Seed cd... | <a href="#">131</a> 2e-29 |
| <a href="#">gb CN151340.1</a>                   | WOUND1_74_H03.g1_A002 Wounded leaves Sorghum b... | <a href="#">131</a> 2e-29 |
| <a href="#">gb CN128191.1</a>                   | RHOH1_27_D12.g1_A002 Acid- and alkaline-treate... | <a href="#">131</a> 2e-29 |
| <a href="#">gb CD431221.1</a>                   | ETH1_7_C10.g1_A002 Ethylene-treated seedlings ... | <a href="#">131</a> 2e-29 |
| <a href="#">gb CN144638.1</a>                   | WOUND1_23_C09.g1_A002 Wounded leaves Sorghum b... | <a href="#">131</a> 2e-29 |
| <a href="#">gb CN147712.1</a>                   | WOUND1_51_D08.g1_A002 Wounded leaves Sorghum b... | <a href="#">130</a> 2e-29 |
| <a href="#">gb CX620548.1</a>                   | GABR1_52_C01.g1_A002 GA- or brassinolide-treat... | <a href="#">130</a> 3e-29 |
| <a href="#">gb CB290392.1</a>                   | UCRCS01_01bb10_b1 Washington Navel orange cold... | <a href="#">130</a> 3e-29 |
| <a href="#">gb DV862750.1</a>                   | CRP2482 Creeping bentgrass EST Agrostis stolon... | <a href="#">130</a> 4e-29 |
| <a href="#">gb EE180130.2</a>                   | ZM_BFc0162E12.r ZM_BFc Zea mays cDNA clone ZM_... | <a href="#">130</a> 4e-29 |
| <a href="#">gb EE040416.2</a>                   | ZM_BFc0105N12.f ZM_BFc Zea mays cDNA clone ZM_... | <a href="#">130</a> 4e-29 |
| <a href="#">gb CX109197.1</a>                   | RECM0573 A normalized whole-life-cycle cDNA li... | <a href="#">130</a> 4e-29 |
| <a href="#">gb DV861049.1</a>                   | CRP781 Creeping bentgrass EST Agrostis stloni...  | <a href="#">130</a> 4e-29 |
| <a href="#">gb CD431884.1</a>                   | ETH1_11_D11.g1_A002 Ethylene-treated seedlings... | <a href="#">130</a> 4e-29 |
| <a href="#">gb EE181047.2</a>                   | ZM_BFc0163K11.f ZM_BFc Zea mays cDNA clone ZM_... | <a href="#">130</a> 5e-29 |
| <a href="#">gb EE190900.2</a>                   | ZM_BFc0190H04.f ZM_BFc Zea mays cDNA clone ZM_... | <a href="#">130</a> 5e-29 |
| <a href="#">gb EC903704.2</a>                   | ZM_BFc0052M17.r ZM_BFc Zea mays cDNA clone ZM_... | <a href="#">130</a> 5e-29 |
| <a href="#">gb EE190286.2</a>                   | ZM_BFc0188A03.r ZM_BFc Zea mays cDNA clone ZM_... | <a href="#">129</a> 5e-29 |
| <a href="#">gb EE040417.2</a>                   | ZM_BFc0105N12.r ZM_BFc Zea mays cDNA clone ZM_... | <a href="#">129</a> 5e-29 |
| <a href="#">gb EG664831.1</a>                   | RCLGP49TP Castor bean cDNA library from leaves... | <a href="#">129</a> 5e-29 |
| <a href="#">gb EE190924.2</a>                   | ZM_BFc0190H20.f ZM_BFc Zea mays cDNA clone ZM_... | <a href="#">129</a> 6e-29 |
| <a href="#">gb EE294911.2</a>                   | ZM_BFc0189N20.f ZM_BFc Zea mays cDNA clone ZM_... | <a href="#">129</a> 6e-29 |
| <a href="#">gb EE294025.2</a>                   | ZM_BFc0188A03.f ZM_BFc Zea mays cDNA clone ZM_... | <a href="#">129</a> 6e-29 |
| <a href="#">gb EE180129.2</a>                   | ZM_BFc0162E12.f ZM_BFc Zea mays cDNA clone ZM_... | <a href="#">129</a> 6e-29 |
| <a href="#">gb EE173587.2</a>                   | ZM_BFc0151M14.f ZM_BFc Zea mays cDNA clone ZM_... | <a href="#">129</a> 6e-29 |
| <a href="#">gb EE169896.2</a>                   | ZM_BFc0145L03.f ZM_BFc Zea mays cDNA clone ZM_... | <a href="#">129</a> 6e-29 |
| <a href="#">gb EE160134.2</a>                   | ZM_BFc0129K03.f ZM_BFc Zea mays cDNA clone ZM_... | <a href="#">129</a> 6e-29 |

## SUPPLEMENTARY FIGURES

**Supplementary Figure S1:** Genomic sequence of EEA. Intron sequences are shown in *italic*, the start- and stopcodon are underlined. The amino acid sequence corresponding to the N-terminal sequence of EEA is shown in **bold**.

ATGGCTTCAACAATCATCGCAACAGGACCCACTTATAGGGTGTACTGCAGG  
**M A S T I I A T G P T Y R V Y C R**

GCCGCCCCCAACTACAATATGACCGTCGGTAAAGGGGTGGCCTTTCTTGCC  
**A A P N Y N M T V G K G V A F L A**

CCTATTGATGAAACAAATGAGCTTCAGGTTTATTCATCAAAGACGATCTAT  
**P I D E T N E L Q**

*TAATTTCTTTTATCTTTTATTTATGTCAAAGTGCATGTTTTCATGATCT*

*TCATCCGTTCTTAAGGATTGTATGCGTATAATTTACAATGAGTTAGCATAT*

*TCTAGTGTGTATATATATATATTAATTTTTTGTGTTGTGGCAGTATTGGTACA*  
**Y W Y K**

AAGATGACACGTACAGCTATATCAAGGACGAAGCGGGCCTTCCTGCATTTT  
**D D T Y S Y I K D E A G L P A F S**

CTCTAGTTAATAAAGCAACTGGTCTAACCCCTAAAACATTCAAATCATCACC  
**L V N K A T G L T L K H S N H H P**

CTGTTCCCTGTAAGAATTCTACGACCTTAACACTGCAGGCTTTCTTAACTTG  
**V P**

*TCATTTATACAATTACCGATAGCATTGTAACCTTTTTTTTTTTGTGGAAATTT*

*ATCATACATGTAGGTGAAATTGGTGA*CTTACAATCCAAATGTTGTTGATGA  
**V K L V T Y N P N V V D E**

GTCTGTCTTATGGTCACAAGCAGACGATCGCGGTGACGGTTACTCGGCCAT  
**S V L W S Q A D D R G D G Y S A I**

AAGGAGTCTTACAAATCCTGCATCACATTTGGAAGCAGCTCCTTTGAATGA  
R S L T N P A S H L E A A P L N D

TTGGTCCTACAATGGTGCTATAATTATGGGCGGAGTCTGGATTGATGCATA  
W S Y N G A I I M G G V W I D A Y

TAACCAGCAGTGGAATAATTGAGCCACACAGTAAGGAAATCATGACGCTAGT  
N Q Q W K I E P H

CTCATTCTTACTTTCTTTTTGGAAATATATATTTCTAATCATCTTCTCTCA

TTTCCAATCATGAATGCAGCAGGTTGA  
T G \*

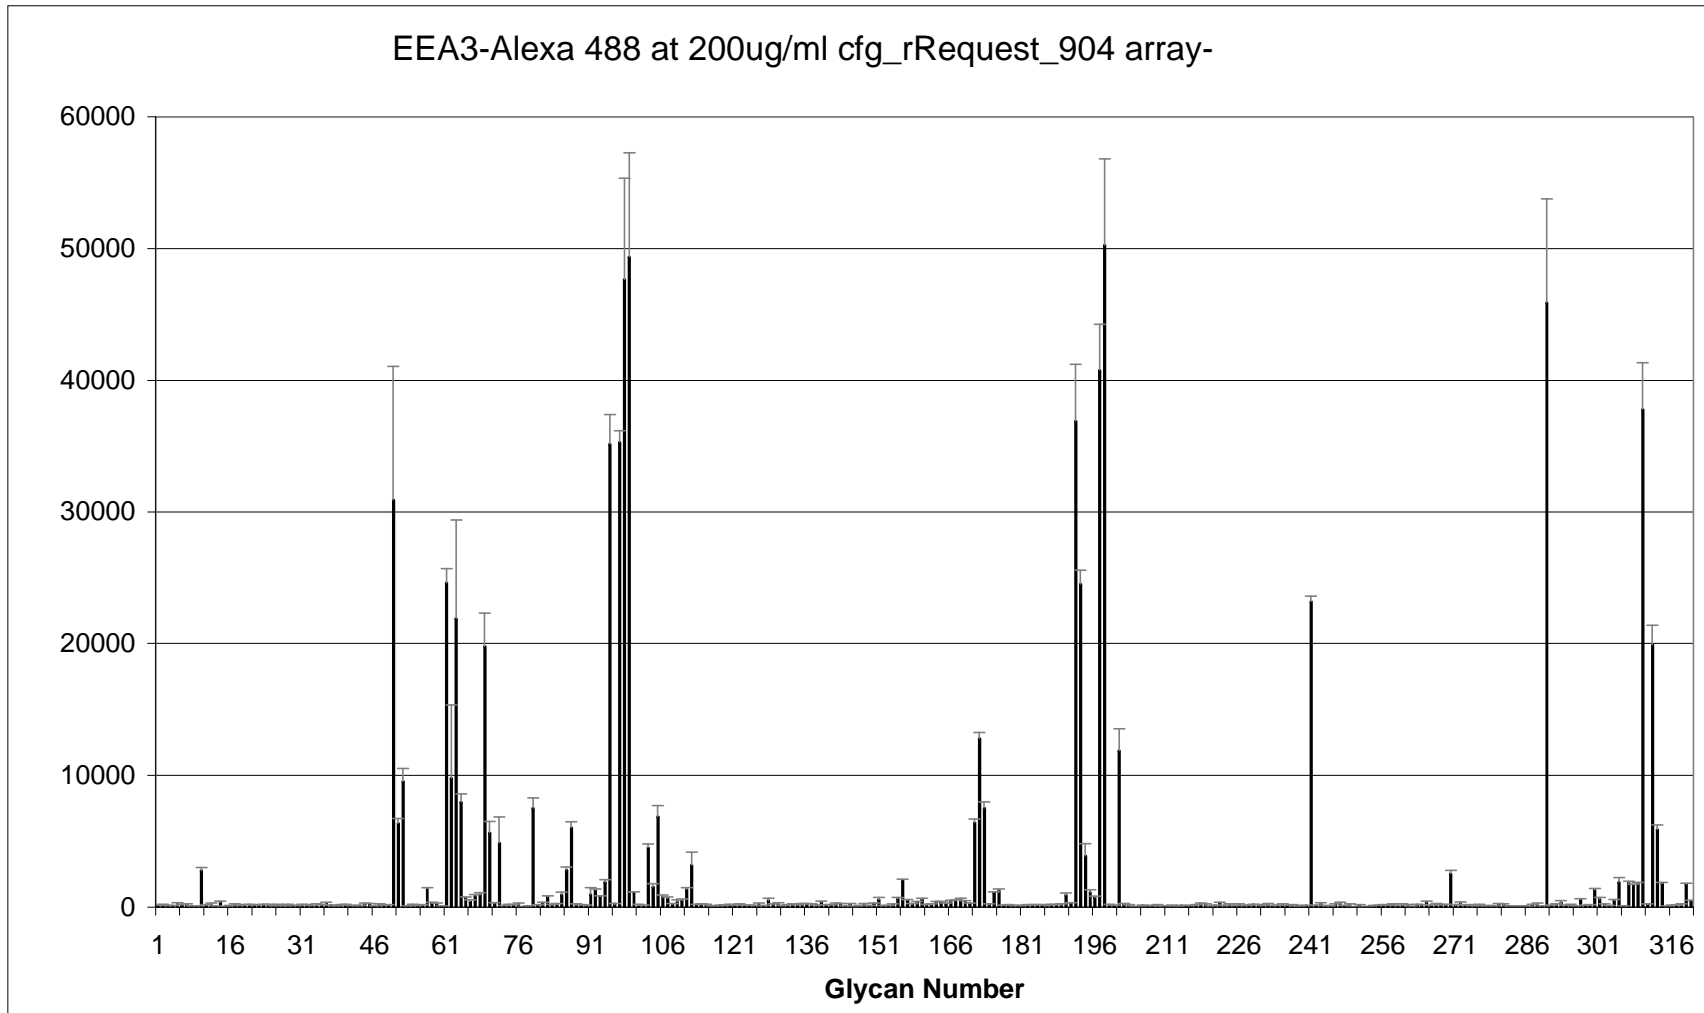

**Supplementary Figure S2:** Determination of the specificity of EEA by screening on the printed array v3 of the Consortium for Functional Glycomics. Error bars represent mean  $\pm$  standard error of the mean. The entire glycan array version is available at <https://www.functionalglycomics.org/static/consortium/resources/resourcecoreh8.shtml>



### Summary of EEA Inhibition by B-active Oligosaccharide and RNase B Glycopeptides

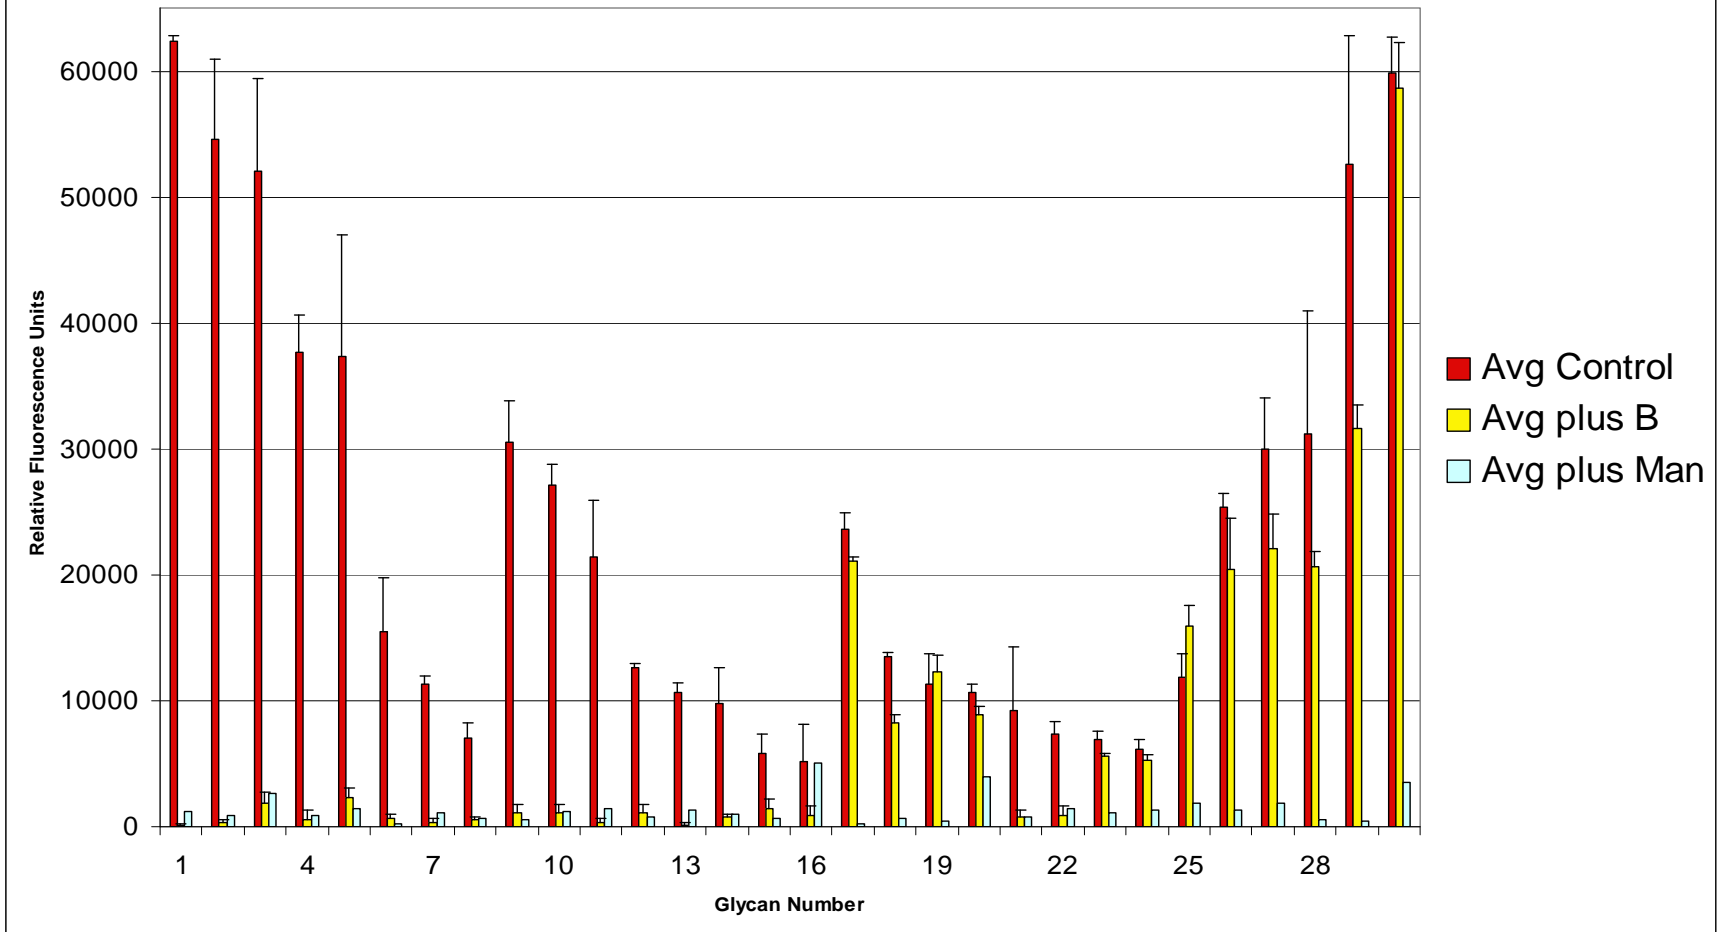

**Supplementary Figure S3:** Summary of EEA inhibition by B-active oligosaccharides and RNase B glycopeptides. Glycan numbers refer to numbers of selected glycans in Table 2. Avg Control = average relative fluorescence units for control (EEA without addition of inhibitor), Avg plus B = average relative fluorescence units for EEA in the presence of blood group B tetrasaccharide, Avg plus Man = average relative fluorescence units for EEA in the presence of a mixture of glycopeptides derived from RNase B.

**Supplementary Figure S4:** Alignment of the amino acid sequences of *osr40g3* (CAA70175.1; Os07g0684000) and the individual ricin-B domains of *Ricinus communis* agglutinin (AAA33869.1)

**A. Alignment of *osr40g3* (residues 45-204) and the N-terminal ricin-B domain of AAA33869.1 (covering residues 309-440)**

```

Osr40g3      CGRTLPPQPPTVKVYCRANPNYAMTARNGAVVLAPANPKDEYQHWIKDMRWSTSİKDEEGY
RicinBn      -----PEPIVRIVGRNGLCVDVTG-----EEFFDGNPIQLWP---CKSNTDWNQLWT
              *: * *:: * . :*: . : * * * . : :
Osr40g3      PAFALVNKATGQAIKHSLGQSHPVRLVPYNPEVMDESVLWTESRDVGNDFRCIRMVNNIY
RicinBn      LRKDSİRSNGKCLTISK-SSPRQQVVIYNCSTATVGATRQIWDN---RTIINPRSGL
              . : : * : : . * . * : : * * . . . . : * * * . .
Osr40g3      LNFDAFHGDKYHGGVVDGTDIVLWKWCEGDNQRWKIQPY
RicinBn      VLAATSGNSGTKLTVQTNİYAVSQGWLPTNNTQ-----
              : : . . : * : . * * : * :

```

**B. Alignment of *osr40g3* (residues 45-204) and the C-terminal ricin-B domain of AAA33869.1 (covering residues 441-564)**

```

Osr40g3      CGRTLPPQPPTVKVYCRANPNYAMTARNGAVVLAPANPKDEYQHWIKDMRWSTSİKDEEGY
RicinBc      -----PFVTTIVGLYG---MCLQANSKGVWLEDCTSEKAEQQWALYADGSİRP-----
              * * . * . : : * . * * * . . . : : * : *
Osr40g3      PAFALVNKATGQAIKHSLGQSHPVRLVPYNPEVMDESVLWTESRDVGNDFRCIRMVNNIY
RicinBc      -----QQRNDNCLTİDANİKGTVVKILSCGPASSGQRWWMFKNDGTI
              * : . . : : : : . * . . . . * * : : .
Osr40g3      LNFDAFHGDKYHGGVVDGTDIVLWKWCEGDNQRWKIQPY
RicinBc      LNLYNGLVLDVRRSDPSLKQIIVHPFHGNLNQIWLPLF--
              ** : . : . . : * : : : . * * *

```

**Supplementary Figure S5:** Sequence alignment of EEA domains retrieved from NCBI database

**Sequences retrieved by Blastp search in NCBI database**  
(redundant sequences have been omitted)

*Arabidopsis thaliana*

>Arath: [ref|NP\\_565899.1|](#) hydroxyproline-rich glycoprotein family protein (At2g39050)

*Plantago major*

>Plama1: [gi|53748491|emb|CAH59433.1|](#) lectin-like protein 1

>Plama2: [gi|53748493|emb|CAH59435.1|](#) lectin-like protein 2

*Populus trichocarpa*

>Poptr: [gb|ABK95474.1|](#) unknown

*Vitis vinifera*

>Vitvi: [emb|CAO23507.1|](#) unnamed protein product

*Triticum aestivum*

>Triae: [gb|AAAY44603.1|](#) stress responsive protein

*Oryza sativa*

Orysa1: [ref|NP\\_001060668.1|](#) Os07g0684000

Orysa2: [ref|NP\\_001041764.1|](#) Os01g0104400

Orysa3: [ref|NP\\_001049995.1|](#) Os03g0327600

Orysa4: [ref|NP\\_001060666.1|](#) Os07g0683600 annotated seq incorrect\*

Orysa5: [ref|NP\\_001060667.1|](#) Os07g0683900

The next 2 sequences are not included in the analysis (because they apparently corresponds to pseudogenes)

Orysa6: [ref|NP\\_001049986.1|](#) Os03g0325700 annotated seq incorrect

Orysa7: [ref|NP\\_001049987.1|](#) Os03g0325900 annotated seq incorrect

*Physcomitrella patens*

>Physco1: [ref|XP\\_001752923.1|](#) predicted protein

>EDQ82427 annotated seq is incomplete\*

>Physco2: [ref|XP\\_001752710.1|](#) predicted protein

>EDQ82581 annotated seq is incomplete\*

>Physco3: [ref|XP\\_001765262.1|](#) predicted protein

>EDQ69990 annotated seq is incomplete\*

>Physco4: [ref|XP\\_001761196.1](#) predicted protein  
>EDQ73918 annotated seq comprises extra N-term

*Picea sitchensis*

>Picsi1: [gb|ABK27004.1](#) unknown [Picea sitchensis]  
>Picsi2: [gb|ABK22768.1](#) unknown [Picea sitchensis]  
>Picsi3: [gb|ABK22123.1](#) unknown [Picea sitchensis]  
>Picsi4: [gb|ABK24175.1](#) unknown [Picea sitchensis]  
>Picsi5: [gb|ABK23307.1](#) unknown [Picea sitchensis]  
>Picsi6: [gb|ABK21966.1](#) unknown [Picea sitchensis]  
>Picsi7: [gb|ABK23910.1](#) unknown [Picea sitchensis]  
>Picsi8: [gb|ABK25355.1](#) unknown [Picea sitchensis]  
>Picsi9: [gb|ABK24374.1](#) unknown [Picea sitchensis]

\*Incorrect and incomplete annotated sequences have been corrected and completed.

**Sequences of EEA domains used to construct dendrogram**

**>EEA**

PTYRVYCRAAPNYNMIVGKGVAF LAPIDETNELQYWKDDTYSYIKD  
EAGLPAFSLVNKATGLTLKHSNHHPVPVKLVTYNPNVVDESVLWSQA  
DDRGDGYSAIRSLTNPASHLEAAPLNDWSYNGAIIMGGVWIDAYNQQ  
WKIEPHTG

**>Arath**

ATVKVYSKAEPNYNLTIRDGKVILAPADPSDEAQHWYKDEKYSTKVK  
DADGHPCFALVNKATGEAMKHSV GATHPVHLIRYVPDKLDESVLWT  
ESKDFGDGYRTIRMVNNTRLNVDAYHGDSKSGGV RDGTTIVLWDWN  
KGDNQLWKIFPF

**>Plama1**

ESYRLYCKRQGQAGGNYCVTARQGGKLYLTHPNGADCNQIWYKVGND  
KVGVI MLVHKATGMVVKHSTTG VQLQLVKKPSGCADKSVLWAESAD  
VSGYRFLKTQTD TNYVMDAWTGIINEGTIISIYPNCINDSNRNAENQ  
LWKLAP

**>Plama2**

ESYRLYCKRQGQAGGNYCVTARQGGKLYLTHPNGADCNQIWYKVGND  
KVGVI MLVHKATGMVVKHSTTG VQLQLVKKPSGCADKSVLWAESAD  
VSGYRFLKTQDD TNYVMDAWTGIINEGTIISIYPNCINDSNRNAENQ  
LWKLAP

**>Poptr**

PSFKVYSKAQPEFHLTIRGGKVILAPSNPSDEFQNWYKDEKYSTRVKD  
SEGCPAFALVNKATGQAMKHSIGE AHPVQLIPYNPDVLDESILWTESK  
DLGDGFRAVRMVNNTHLNVD AFHGDKKSGGVHDGTSIVLWKWNKG  
DNQRWKIIPTRY

**>Vitvi**

PTVRVFCKAKPNHSLTILDGKVYLAPSDKTDMLQHWIKDEKYSTSVK  
DEEGFPSFALVNKATGQAMKHSIGASHPVQLIPYNPDVLDDESVLWTES  
KDLGDNFRSIRMINNIHLNVDALHGDRSHGSHVDCTTIVLNKWKKGDN  
QLWKISLY

**>Triae**

PTVKIYCRANPNYAMSVRNGKVVLAPANPKDDYQHWIKDMRWSTSI  
KDEEGYPAFAMVNKATGQAIAKHSGLGQSHPVRLVPYNPDYLDDESVLWT  
ESRDVGNGFRCVRMVNNIYLNFDALNGDKYHGGVRDGTTEVVLWKC  
EGDNQRWKLQPY

**>Orysa1**

PTVKVYCRANPNYAMTARNGAVVLAPANPKDEYQHWIKDMRWSTSI  
KDEEGYPAFALVNKATGQAIAKHSGLGQSHPVRLVPYNPEVMDESVLWT  
ESRDVGNGFRCIRMVNNIYLNFDALFHGDKYHGGVRDGTDIVLWKC  
EGDNQRWKIQPY

**>Orysa2**

VTHRIYCKAGEDNYSLAVRDGKVCLVRSRDRDDHTQHWVKDMKYSTR  
VKDEEGYPAMALVNKATGDALKHSIGQSHPVRLVRYNPEYMDDESVL  
WTESRDVGSFRCIRMVNNIYLNFDALHGDKDHGGVRDGTTLVLWE  
WCEGDNQRWKIVPW

**>Orysa3N**

PTFKIFCRADEGYCVAVREGNVVLAPTNPDRDEHQHWYKDMRFSKIK  
DEEGNPAFALVNKATGLAIKHSGLGQGHVPKLPFNPEYPDESVLWTE  
SGDVGKSFRCIRMLNIRLNFDALFHGDKDHGGVHDGTTIVLWEWAKG  
DNQCWKILPW

**>Orysa3C**

PTVRIFCKADEGFSVTVRGGSVCLAPTNPDRDEYQHWIKDMRHSNSIKD  
EEGYPAFALVNRVTGEAIAKHSQGEHPVKLPYNPGYQDESVLWTES  
RDVGHGFRCIRMVNNIYLNFDALHGDKDHGGVRDGTVALWKC  
DNQRWKIVPW

**>Orysa4N**

PTFKIFCRADEGYCLTVRHDAVVLAPTNPDRDCQHWYKDMRHSTRV  
KDEEGHPAFALVNRATGLAVKHSGLGQSHPVKLPYNPEYQDESVLWT  
ESKDVGHGFRCIRMVNNIYLNLDALFHGDKSHGGVHDGTTVVLWEWC  
KGDNQCWKILPW

**>Orysa4C**

EPTVRILCRADEAYSCLTVRNGAVCLAPTNPDRDFQHWVKDMRHSTSI  
KDEEGYPAFALVNKATGEAIAKHSGLGQSHPVRLVPYNPEYLDDESVLWT  
ESKDVGHGFRCVRMVNNIYLNFDALFHGDKDHGGVHDGTTVVLWEWC  
KGDNQRWKLIPW

**>Orysa5N**

QIFKIFCRANENYCLTVRDSAVVLAPVNPKDEHQHWFKDMRFSTKVK  
DGEGMPAFALVNKATGLAVKHSGLGQSHPVKLPFNPEYEDASVLWTE  
SKDVGKGFRCIRMVNNTRLNLDAFHGDKDHGGVRDGTTVVLWEWCK  
GDNQSWKILPW

**>Orysa5C**

VHTVRVFS AAGEDYCLTVRNGTACLAPKNPRDDYQHWIKDMRHSNK  
IRDEEGYPAFALVNKVTGEAIKHSTGQGHPVKLVPYNPEYQDESVLW  
TESKDVGKGFRCIRMVNNIYLNFD AFHGDKDHGGIHDGTEIVLWKWC  
EGDNQRWKILPW

**>Physco1N**

EAVRLHCRADPNFCLAAIPGQGPVMPNNESDAYQVWYKDESMSNR  
VKDESGAHAFSLINKATGECLRHPEDLQQCLLVVYEPNAQDESVLW  
TMSEDMGQGYRCIRVVT SITRNLDVLRGDKKSGGMKNGSSVITFAWK  
NQDNQVWKMPV

**>Physco1C**

HAVRLHCRADPNFSIAVIPGQGTIMVPTNASDAHQIWYRDESMSNRV  
TDESGAHAFALINKVTGECLRHPEDLKQCLLADYEPNGLDESVLWT  
MSEDMGQGYRCIRVVT SITRNLDVLRGDKKSGGVKTGSPLITFAWKN  
QDNQVWKMPA

**>Physco2**

HPVRIHCKADPSYNLAVVPGQGPVMPVPTDISDDYQVWYKDETISTRV  
TDETGASAFSLINKATGQALRHAPEDLKQCLLTQYEPNGLDDTIWWT  
MSEDMGQGYHCIRLATDITRNMDVLRGDKKSGGVKEGSPVITFAWKK  
QDNQIWKMPA

**>Physco3**

LPVRLHCKADPNFNLA AVPGQGPVMPVFPSPNDDFQVWYKDVTMSTR  
VKDETGSSAFSLINKATGQALRHAPEDLAQCLLADYDSNALDQTVLW  
TMSEDMGQGYCCIRLASQITRNLDVLRGDKKSGGVKEGSPVITFAWK  
KQDNQIWKMITA

**>Physco4**

ETVRIHSKANANYNVA VRGTVGHGTCIVMADDDTSSQLWLKDDKMA  
WTFDKKGGFSIVHKDTMKAIRVAPEEGKVLLADYDPRKLD ESLIY  
QSSNRGRNYHTIYNGTSETVLHALRCTQCELMQPCTEGNAHMKENTL  
VVVMKDRTKKDDPATVAMNQLWKLTPS

**>Picsi1**

GQVVRVFTKANPDFSLAIRNGSAVLVHANAHDKHQWVNDETYSTK  
VKDEANCPFSFLVNKATGQALKHGLGETQPVLLTEYQLNTFDESILW  
TMSGDMGQGYRTIRLVNNIHLNLDAFHGDKKSGGIKDGPNPVVLSW  
KKGDNQLWKIVPY

**>Picsi2**

GQVVRVLTKANPDFSLAIRNGSAVLVHANANDKHQQWVMDETYSTK  
VKDEASCPSFSLVNKATGQVLKHGLGETQPVLLTEYQLNTFDESILWT  
MSGDMGQGYRTIRLVNNIHLNLDAFHGDKKSGGIKDGPNPVVLSWK  
KGDNQLWKIVPY

**>Picsi3**

GQIVRVCSKANPDYALAIRDGRAVMVFYNPNDPTMQWVKDESWSNQ  
VRDQVGHPAFALVNKATGQALRHATAECQEVLLTQYEGASTYDENV  
LWSESEDMGYGYRTVRMANNIGLNLDAFQGGRRNGGIRDGTRAVLW  
KWNKQDNQLWKLSPCY

**>Picsi4**

GQIVRVCSKANPDYALAIRDGRAVMVFYNPNDPTMQWVKDESWSNQ  
VRDQVGHPAFALVNKATGQALRHAIAECQEVLLTQYEGASTYDENVL  
WSESEDMGYGYRTVRMANNIGLNLD AFQGDRRNGGIRDGTRAVLWK  
WNKQDNQLWKLSPCY

**>Picsi5**

GQIVRVCSKANPDYALAIRDGRAVMVFYNPNDPTMQWVKDESWSNQ  
VRDQVGHPAFALVNKATGQALRHAIAESQEVLLTQYKGPSTYDENIL  
WSESEDMGYGYRTVRMANNIGLNLD AFQGDRRNGGIRDGTRAVLWK  
WNKQDNQLWKLSPCY

**>Picsi6**

GQIVRVCSKANPDYALAIRDGRAVMVFYNPNDPTMQWVKDESWSNQ  
VRDQVGHPAFALVNKATGQALRHAIAESHEVLLTQYEGPSTYDENIL  
WSESEDMGYGYRTVRMANNIGLNLD AFQGDRRNGGIRDGTRAVLWK  
WNKQDNQLWKLSPCY

**>Picsi7**

GETVKIYCEANPDFLLASRNESVVMVPANESDPSQQWIMDTSSVKA  
KDDAGFP AFALVNKATGQALRHGRSEKDKVTLGPHYHPDDLNEAVLFT  
QSADV GKG YQCIRPVNNTHLNLDASAGDDKHHV ALSEGTEIVLCKWN  
K KESQKWKISPI

**>Picsi8N**

GEIVKIYCEANPEYYLTAKEDSVV L APGDES NPYQQWIIDGTWGIRVK  
DSAGFP AFALINKATRQALRHGKEEKEKVHTCPYSKDELNEVVLWTQ  
SDDVGN GYK CIRPVDNTDLNLDANHGDPESGGIQDGTDLILFKWKKQ  
ENQKWKILPIS

**>Picsi8C**

GQSVRIYCEQSPEYFLTVRDGEVVLTPGDADDVSQHWIKVDEWGNKI  
RDEVGFPAFALVSKATL KALKHGSQEWDRVELSYNENDLDESVLWT  
QSADVGRGYQCIRPVGNIHLNIDAKLADGKHGNVEDGNELILFSWKK  
QKNQKWKMLPVD

**>Picsi9N**

GETVKIYCEANPDFLLASRNESVVMVPANESDPSQQWIMDTSSSVKA  
KDDAGFP AFALVNKATGQALRHGRSEKDKVTLGPHYHPDDLNEAVLFT  
QSADV GKG YQCIRPVNNTHLNLDASAGDDKHHV ALSEGTEIVLCKWN  
K KESQKWKISPIL

**>Picsi9C**

GSTVRIHCEANPEFFLAARGDVAVLAPENPRDPHQQWIKVDSWGLRV  
KDEAGFP AFALVNKATRHALKHGDK EWDQIYLADYNHDKAEQSVLW  
TLSADVGN GYQCLRPVNNINLNMDAKAADGHVGGIRDGNELILFEWK  
KQSNQKWKLPVH

## Sequence alignment of EEA domains\*\*

CLUSTAL 2.0.3 multiple sequence alignment

```
Orysa4N      -PTFKIFCRADEG-YCLTVRHDA-VVLAPTNPRDDCQHWYKDMRHSTRVKDEEGHPAFAL 57
Orysa5N      -QIFKIFCRANEN-YCLTVRDSA-VVLAPVNPKDEHQHWFKDMRFSTKVKDGEGMPAFAL 57
Orysa3N      -PTFKIFCRADEG-YCVAVREGN-VVLAPTNPRDEHQHWYKDMRFSAKIKDEEGNPAFAL 57
Orysa4C      EPTVRIILCRADEA-YSLTVRNGA-VCLAPTNPRDDFQHWVKDMRHSTS IKDEEGYPAFAL 58
Orysa3C      -PTVRIIFCKADEG-FSVTVRGGG-VCLAPTNPRDEYQHWIKDMRHSNSIKDEEGYPAFAL 57
Orysa5C      VHTVRFVSAAGED-YCLTVRNGT-ACLAPKNPRDDYQHWIKDMRHSNKIRDEEGYPAFAL 58
Triae        -PTVKIYCRANPN-YAMSVRNGK-VVLAPANPKDDYQHWIKDMRWSTS IKDEEGYPAFAM 57
Orysa1       -PTVKVYCRANPN-YAMTARNGA-VVLAPANPKDEYQHWIKDMRWSTS IKDEEGYPAFAL 57
Orysa2       -VTHRIYCKAGEDNYS LAVRDGK-VCLVRSDDRDDHTQHWVKDMKYSTRVKDEEGYPAMAL 58
Arath        -ATVKVYSKAEPN-YNLTIRDGK-VILAPADPSDEAQHWYKDEKYSTRVKDADGHPCFAL 57
Poptr        -PSFKVYSKAQPE-FHLTIRGGK-VILAPSNPSDEFQNWYKDEKYSTRVKDSEGCPAFAL 57
Vitvi        -PTVRFVCKAKPN-HSLTILDGK-VYLAPSDKTDLQHWIKDEKYSTS VKDEEGFPFSL 57
EEA          -PTYRVYCRAAPN-YNMIVGKGV-AFLAPIDETNELQYWKDDTYS-YIKDEAGLPFSL 56
Picsi7       GETVKIYCEANPD-FLLASRNES-VVMVPANESDPSQQWIMDTSSVVKAKDDAGFPFAL 58
Picsi9N      GETVKIYCEANPD-FLLASRNES-VVMVPANESDPSQQWIMDTSSVVKAKDDAGFPFAL 58
Picsi8N      GEIVKIYCEANPE-YLTAKEDS-VVLAPGDESNPYQQWIIDGTWGI RVKDSAGFPFAL 58
Picsi8C      GQSVRIYCEQSPE-YFLTVRDGE-VVLT PGDADDVSQHWIKVDEWGNKIRDEVGFPFAL 58
Picsi9C      GSTVRIHCEANPE-FFLAARGDV-AVLAPENRPDPHQWIKVDSWGLRVKDEAGFPFAL 58
Physco1N     -EAVRLHCRADPN-FCLAAIPGQG PVMVPNNESDAYQVWYKDESMSNRVKDESGAHAFSL 58
Physco1C     -HAVRLHCRADPN-FSIAVIPGQGTIMVPTNASDAHQIWYRDESMSNRVTDESGAHAFAL 58
Physco2      -HPVRIHCKADPS-YNLAVVPGQG PVMVPTDISDDYQVWYKDETI STRVTDET GASAFSL 58
Physco3      -LPVRLHCKADPN-FNLAAVPGQG PVMVPFSPNDDFQVWYKDVTMSTRVKDET GSSAFSL 58
Picsi1       GQVVRVFTKANPD-FSLAIRNGS-AVLVHANAHDKHQQVWVNDETYSTKVKDEANCPSFSL 58
Picsi2       GQVVRVLTKANPD-FSLAIRNGS-AVLVHANANDKHQQQVWVMDETYSTKVKDEASCPSFSL 58
Picsi3       GQIVRVCSKANPD-YALAIRDGR-AVMVFYNPNDPTMQVWKDESWSNQVRDQVGHPAFAL 58
Picsi4       GQIVRVCSKANPD-YALAIRDGR-AVMVFYNPNDPTMQVWKDESWSNQVRDQVGHPAFAL 58
Picsi5       GQIVRVCSKANPD-YALAIRDGR-AVMVFYNPNDPTMQVWKDESWSNQVRDQVGHPAFAL 58
Picsi6       GQIVRVCSKANPD-YALAIRDGR-AVMVFYNPNDPTMQVWKDESWSNQVRDQVGHPAFAL 58
          ::          . :          :. . :          *          .          *          . . : : :
```



Orysa4N VN RATGLAVKHS LGQSHPVKLV PYN-PEYQDESVLWTESKDVGHGFRCIRMVNNIYLNLD 116  
Orysa5N VN KATGLAVKHS LGQSHPVKLV PNFN-PEYEDASVLWTESKDVGKGFRCIRMVNNTRLNLD 116  
Orysa3N VN KATGLAIKHS LGQGHVPV K LAPFN-PEYPDESVLWTESG DVGKSFRCIRMLNNI RL NFD 116  
Orysa4C VN KATGEAIKHS LGQSHPVRLV PYN-PEYLDDESVLWTESKDVGHGFRCVRMVNNIYLNFD 117  
Orysa3C VN RVTGEAIKHS QGEGHPV KLV PYN-PGYQDESVLWTESR DVGHGFRCIRMVNNIYLNFD 116  
Orysa5C VN KVTGEAIKHS TGQGHVPV KLV PYN-PEYQDESVLWTESKDVGKGFRCIRMVNNIYLNFD 117  
Triae VN KATGQAIKHS LGQSHPVRLV PYN-PDYLDDESVLWTESR DVGNGFRCVRMVNNIYLNFD 116  
Orysa1 VN KATGQAIKHS LGQSHPVRLV PYN-PEVMDESVLWTESR DVGNGFRCIRMVNNIYLNFD 116  
Orysa2 VN KATGDALKHS IGQSHPVRLV RYN-PEYMDDESVLWTESR DVGSGFRCIRMVNNIYLNFD 117  
Arath VN KATGEAMKHS V GATHPVHLIR YV-PDKLDESVLWTESKDFGDGYRTIRMVNNTRLNVD 116  
Poptr VN KATGQAMKHS IGEAHPVQLIP YN-PDVLDESILWTESKDLGDFRAVRMVNNTHLNVD 116  
Vitvi VN KATGQAMKHS IGASHPVQLIP YN-PDVLDESVLWTESKDLGDNFRSIRMINNIHLNVD 116  
EEA VN KATGLTLKHS NHHPVPV KLV TYN-PNVVDESVLWSQADDRGDGYSAIRSLTNPASHLE 115  
Picsi7 VN KATGQALRHGRSEKDKVTLG PYH-PDDLNEAVLFTQSADVGKGYQCIRPVNNTHLNLD 117  
Picsi9N VN KATGQALRHGRSEKDKVTLG PYH-PDDLNEAVLFTQSADVGKGYQCIRPVNNTHLNLD 117  
Picsi8N IN KATRQALRHGKKEEKEKVHTCPYS-KDELNEVVLWTQSDDVGNGYKCIRPVDNTDLNLD 117  
Picsi8C VSKATLKALKHGSQEWDRVELSYYN-ENDLDESVLWTQSADVGRGYQCIRPVGNIHLNID 117  
Picsi9C VN KATRHALKHGDKEDQIYLADYN-HDKAEQSVLWTL SADVGNQYQCLRPVNNINLNM 117  
PhyscolN IN KATGECLRHPPEDLQCLLVVYE-PNAQDESVLWTMS EDMGQGYRCIRVVTSITRNL 117  
PhyscolC IN KVTGECLRHPPEDLKQCLLADYE-PNGLDESVLWTMS EDMGQGYRCIRVVTSITRNL 117  
Physco2 IN KATGQALRHAPEDLKQCLLADYE-PNGLDDTIWWTMS EDMGQGYHCIRLATDITRNM 117  
Physco3 IN KATGQALRHAPEDLKQCLLADYD-SNALDQTVLWTMS EDMGQGYCCIRLASQITRNL 117  
Picsi1 VN KATGQALKHGLGETQP VLLTEYQ-LNTFDESILWTMSGDMQGYRTIRLVNNIHLNLD 117  
Picsi2 VN KATGQVLKHGLGETQP VLLTEYQ-LNTFDESILWTMSGDMQGYRTIRLVNNIHLNLD 117  
Picsi3 VN KATGQALRHATAECQEVLLTQYEGASTYDENVLWSESEDMGYGYRTVRMANNIGLNLD 118  
Picsi4 VN KATGQALRHAI AECQEVLLTQYEGASTYDENVLWSESEDMGYGYRTVRMANNIGLNLD 118  
Picsi5 VN KATGQALRHAI AESQEVLLTQYKGPSTYDENILWSESEDMGYGYRTVRMANNIGLNLD 118  
Picsi6 VN KATGQALRHAI AESHEVLLTQYEGPSTYDENILWSESEDMGYGYRTVRMANNIGLNLD 118  
: . : \* : : \* : : : : \* \* . : : \* . : :

Orysa4N AFHGD-KSHGGVHDGTTVVLEW ECKGDNQCWKILPW-- 151  
Orysa5N AFHGD-KDHGGVRDGT T VVLEW ECKGDNQSWKILPW-- 151  
Orysa3N AFHGD-KDHGGVHDGTTIVLEW EAKGDNQCWKILPW-- 151  
Orysa4C AFHGD-KDHGGVHDGTTVVLEW ECKGDNQRWKILPW-- 152  
Orysa3C ALHGD-KDHGGVRDGT T VALWKWCEGDNQRWKIVPW-- 151  
Orysa5C AFHGD-KDHGGIHDGTEIVLWKWCEGDNQRWKILPW-- 152  
Triae ALNGD-KYHGGVRDGT E VVLEW ECKGDNQRWKLQPY-- 152  
Orysal AFHGD-KYHGGVRDGT DIVLWKWCEGDNQRWKIQPY-- 152

|          |                                         |     |
|----------|-----------------------------------------|-----|
| Orysa2   | ALHGD-KDHGGVVDGTTLVLWLEWCEGDNQRWKIVPW-- | 152 |
| Arath    | AYHGD-SKSGGVRDGTITVLWDWNKGDNLWKIFPF--   | 151 |
| Poptr    | AFHGD-KKSGGVHDGTSIVLWKWNKGDNRWKIIPTRY   | 153 |
| Vitvi    | ALHGD-RSHGSVHDCTTIVLNKWKKGDNQLWKISLY--  | 151 |
| EEA      | AAPLN-DWS---YNGAIIMGVWIDAYNQWQKIEPHTG   | 149 |
| Picsi7   | ASAGDDKHHVALSEGTEIVLCKWNKESQKWKISPI--   | 153 |
| Picsi9N  | ASAGDDKHHVALSEGTEIVLCKWNKESQKWKISPIL-   | 154 |
| Picsi8N  | ANHGD-PESGGIQDGTDLILFKWKKQENQWKILPIS-   | 153 |
| Picsi8C  | AKLAD-GKHGNVEDGNELILFSWKKQKNQKWKMLPVD-  | 153 |
| Picsi9C  | AKAAD-GHVGGIRDGNELILFEWKKQSNQKWKLPVH-   | 153 |
| Physco1N | VLRGD-KKSGGMKNGSSVITFAWKNQDNQVWKMPV--   | 152 |
| Physco1C | VLRGD-KKSGGVKTGSPLITFAWKNQDNQVWKMPA--   | 152 |
| Physco2  | VLRGD-KKSGGVKEGSPVITFAWKKQDNQIWKMPA--   | 152 |
| Physco3  | VLRGD-KKSGGVKEGSPVITFAWKKQDNQIWKMITA--  | 152 |
| Picsi1   | AFHGD-KKSGGIKDGNPVVLWSWKKGDNLWKIVPY--   | 152 |
| Picsi2   | AFHGD-KKSGGIKDGNPVVLWSWKKGDNLWKIVPY--   | 152 |
| Picsi3   | AFQGD-RRNGGIRDGTRAVLWKWNKQDNQLWKLSPCY-  | 154 |
| Picsi4   | AFQGD-RRNGGIRDGTRAVLWKWNKQDNQLWKLSPCY-  | 154 |
| Picsi5   | AFQGD-RRNGGIRDGTRAVLWKWNKQDNQLWKLSPCY-  | 154 |
| Picsi6   | AFQGD-RRNGGIRDGTRAVLWKWNKQDNQLWKLSPCY-  | 154 |

\*\*Alignment of all sequences except Plama1, Plama2 and Physco4. The latter sequences were omitted to get a better alignment of EEA with other proteins with EUL domain(s).
